# Supplementary material for: On the origin of the occasional spring nitrate peak in Greenland snow
Source: Copernicus journal article supplement (doi:10.5194/acp-14-13361-2014), 2014-12-16
Supplement: Supplementary file 1 [file acp-14-13361-2014-supplement.zip]

Archive with 3 entries (3 files):
- acp-14-13361-2014-supplement-cover-letter.pdf
- supplemental data.txt
- Supplemental texts and figures.pdf
