# Supplementary material for: On the origin of the occasional spring nitrate peak in Greenland snow
Source: Copernicus journal article supplement (doi:10.5194/acp-14-13361-2014), 2014-12-16
Supplement: Supplementary file 1 [file acp-14-13361-2014-supplement.zip › acp-14-13361-2014-supplement-cover-letter.pdf]

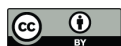

## *Supplement of*

# **On the origin of the occasional spring nitrate peak in Greenland snow**

**L. Geng et al.**

*Correspondence to:* L. Geng (leigeng@uw.edu)

- [acp-14-13361-2014-supplement-cover-letter.pdf](#)
- [Supplemental texts and figures.pdf](#)
- [supplemental data.txt](#)
