# Supplementary material for: On the origin of the occasional spring nitrate peak in Greenland snow
Source: Copernicus journal article supplement (doi:10.5194/acp-14-13361-2014), 2014-12-16
Supplement: Supplementary file 1 [file acp-14-13361-2014-supplement.zip › supplemental data.txt]

On the origin of the occasional springtime nitrate concentration maximum in Greenland snow

L. Geng1,*, J. Cole-Dai1, B. Alexander2, J. Savarino3,4, A. J. Schauer5, E. J. Steig5, P. Lin2,**, Q. Fu2, M. C. Zatko2 

1 Department of Chemistry & Biochemistry, South Dakota State University, Brookings, SD, USA 
2 Department of Atmospheric Sciences, University of Washington, Seattle, WA, USA 
3 CNRS, LGGE (UMR5183), F-38041 Grenoble, France 
4 Univ. Grenoble Alpes, LGGE (UMR5183), F-38041 Grenoble, France.
5 Department of Earth and Space Sciences, University of Washington, Seattle, WA, USA
* Now at Department of Atmospheric Sciences, University of Washington, Seattle, WA, USA
** Now at Program in Atmospheric and Oceanic Sciences / GFDL, Princeton University, Princeton, NJ, USA


This file contains data for Figure 1 and figure 2; 


Data for figure 1:

Note: 
1) D17O = d17O -0.52* d18O, the isotopic data are for nitrate;

2) SP-1 samples were collected in the field and measured at LGGE; SP-2 samples were collected the six snow blocks at SDSU and measured there; SB samples were collected from the depth interval of 0.7 to 1.75 m of the snow blocks and measured at SDSU for concentrations and at UW for isotopic ratios. 

sample	depth	NO3-   	d18O 	D17O	d15N 		Sample 	depth  	NO3	SO4	Na	Mg				Sample	depth	NO3-   	d17O 	d18O 	D17O	d15N 
ID	(m)    (��g/l) (permil)(permil) (permil)		ID	(m)	(ug/l)	(ug/l)	(ug/l)	(ug/l)				 ID	(m)    (��g/l) (permil) (permil)(permil) (permil)

SP-1_1	0.002	502.8	81.8	28.1	-4.7		SP-2_1	0.01	271.84	90.4	1.81	2.03				SB_1	0.73	119.04	70.37	79.34	29.48	11.95
SP-1_2	0.025	277.6	74.4	28.3	0.3		SP-2_2	0.04	128.16	54.53	0.92	1.33				SB_2	0.77	117.81	73.52	80.60	32.03	5.43
SP-1_3	0.075	96.3	72.7	29.5	0.9		SP-2_3	0.07	77.52	110.29	6.81	2.31				SB_3	0.80	110.20	75.23	82.40	32.81	14.01
SP-1_4	0.115	158.2	89.0	32.8	4.0		SP-2_4	0.1	79.29	64.03	7.12	1.48				SB_4	0.83	90.59	73.36	79.31	32.55	1.84
SP-1_5	0.145	91.6	86.4	32.7	3.6		SP-2_5	0.13	71.49	31.71	3.46	0.86				SB_5	0.87	52.21	72.31	78.88	31.70	-5.21
SP-1_6	0.17	116.9	nan	nan	1.3		SP-2_6	0.16	92.02	48.09	11.06	1.62				SB_6	0.90	74.78	74.02	79.91	32.90	2.69
SP-1_7	0.19	74.5	80.1	33.5	1.7		SP-2_7	0.19	109.52	47.77	16.99	2.61				SB_7	0.93	97.47	71.73	76.64	32.31	-1.51
SP-1_8	0.235	63.1	84.6	33.6	-0.8		SP-2_8	0.22	72.95	26.85	3.74	0.67				SB_8	0.97	75.55	73.84	79.69	32.84	-0.91
SP-1_9	0.275	54.2	83.4	35.2	-2.5		SP-2_9	0.25	55.74	15.77	1.29	0.4				SB_9	1.00	91.55	74.90	79.84	33.89	-10.99
SP-1_10	0.32	56.2	71.1	31.8	-7.5		SP-2_10	0.28	54.57	13.94	1.3	0.38				SB_10	1.03	100.58	75.21	81.11	33.47	-3.62
SP-1_11	0.37	70.2	85.7	35.5	-12.4		SP-2_11	0.31	52.39	27.23	2.31	1.9				SB_11	1.07	86.74	76.56	85.24	32.66	-6.62
SP-1_12	0.425	120.2	82.6	34.7	-12.5		SP-2_12	0.34	22.32	4.77	0.9	0.23				SB_12	1.11	91.15	75.99	83.16	33.19	-10.15
SP-1_13	0.48	91.8	79.6	33.1	-8.5		SP-2_13	0.36	88.51	39.35	3.89	0.75				SB_13	1.14	94.08	76.07	83.36	33.20	-9.01
SP-1_14	0.535	118.1	87.1	31.9	-6.6		SP-2_14	0.39	122.11	37.03	4.76	0.66				SB_14	1.17	99.19	73.84	82.15	31.56	-5.76
SP-1_15	0.575	111.8	78.9	30.0	-4.6		SP-2_15	0.42	105.89	40.43	9.03	1.14				SB_15	1.19	120.02	71.00	79.83	29.88	-1.93
SP-1_16	0.615	123.2	77.1	27.5	-0.9		SP-2_16	0.45	86.4	17.99	2.4	0.56				SB_16	1.21	179.74	66.92	74.76	28.42	-10.78
SP-1_17	0.665	138.8	74.1	26.2	-1.3		SP-2_17	0.48	112.76	42.75	0.71	0.43				SB_17	1.23	228.49	63.35	70.37	27.11	1.83
SP-1_18	0.71	268.5	78.0	27.8	6.4		SP-2_18	0.51	151.68	49.04	0.64	0.31				SB_18	1.26	256.69	62.57	69.54	26.75	1.95
SP-1_19	0.745	145.7	nan	nan	4.3		SP-2_19	0.54	141.45	45.76	0.35	0.26				SB_19	1.28	248.01	63.83	71.19	27.16	7.11
SP-1_20	0.79	140.8	nan	nan	nan		SP-2_20	0.57	136.3	72.5	0.5	0.19				SB_20	1.31	178.25	68.48	76.61	29.02	5.92
SP-1_21	0.835	101.0	84.8	33.5	7.4		SP-2_21	0.6	116.09	25.31	0.44	0.18				SB_21	1.34	105.15	73.93	83.26	31.05	8.78
SP-1_22	0.875	92.3	80.9	32.9	5.5		SP-2_22	0.63	132.4	29.9	0.35	0.15				SB_22	1.38	88.61	75.03	86.00	30.71	5.09
SP-1_23	0.925	66.3	83.8	32.6	-1.5		SP-2_23	0.66	290	38.88	0.45	0.23				SB_23	1.43	111.85	70.18	77.67	30.20	3.02
SP-1_24	0.97	64.2	79.0	32.0	-0.4		SP-2_24	0.69	290.9	38.75	0.86	0.34				SB_24	1.47	153.61	70.72	76.78	31.24	9.19
SP-1_25	1.015	72.9	79.1	31.9	-2.9		SP-2_25	0.71	120.14	34.95	0.57	0.27				SB_25	1.50	160.88	72.35	78.54	31.97	4.75
SP-1_26	1.07	92.6	72.3	31.9	-5.1		SP-2_26	0.74	117.55	70.24	2.81	1.86				SB_26	1.55	122.95	71.62	77.61	31.71	-6.01
SP-1_27	1.135	91.8	82.9	31.9	-6.9		SP-2_27	0.77	119.82	113.54	7.5	4.74				SB_27	1.60	68.76	76.45	84.57	32.93	8.35
SP-1_28	1.195	81.3	77.5	28.9	-4.9		SP-2_28	0.8	108.85	136.81	10.66	5.8				SB_28	1.66	37.67	75.32	82.89	32.66	-5.37
SP-1_29	1.245	146.3	75.1	26.9	1.2		SP-2_29	0.83	97.28	63.29	2.53	1.59				SB_29	1.72	39.87	76.27	83.00	33.59	-7.51
SP-1_30	1.285	246.5	75.0	26.4	7.2		SP-2_30	0.86	43.88	27.91	5.68	1.95										
SP-1_31	1.325	218.4	78.8	28.3	10.1		SP-2_31	0.89	77.22	48.58	8.16	1.31										
SP-1_32	1.375	95.3	89.2	30.9	4.8		SP-2_32	0.92	70.76	39.58	3.96	0.84										
SP-1_33	1.425	88.7	84.7	29.7	8.2		SP-2_33	0.95	65.42	10.68	2.75	0.54										
SP-1_34	1.47	111.4	81.7	30.1	6.0		SP-2_34	0.98	81.64	29.72	14.41	1.87										
SP-1_35	1.515	140.8	77.7	31.1	7.3		SP-2_35	1.01	94.87	41.38	15.41	2.39										
SP-1_36	1.56	168.2	81.6	31.6	7.4		SP-2_36	1.04	101.41	23.82	1.77	0.58										
SP-1_37	1.61	133.9	83.3	31.3	0.4		SP-2_37	1.06	85.64	21.67	1.52	0.29										
SP-1_38	1.66	101.5	83.4	31.3	-4.0		SP-2_38	1.09	89.77	46.3	1.95	1.62										
SP-1_39	1.705	70.8	81.6	32.4	-7.0		SP-2_39	1.12	93.37	42.89	3.66	0.48										
SP-1_40	1.75	40.5	81.5	31.0	-11.9		SP-2_40	1.15	95.11	37.18	2.42	0.41										
SP-1_41	1.795	66.7	82.2	32.2	-12.6		SP-2_41	1.18	104.32	29.58	1.84	0.4										
SP-1_42	1.84	106.8	81.3	33.7	-12.0		SP-2_42	1.21	179.77	44.68	0.44	0.88										
SP-1_43	1.87	74.4	84.6	32.4	-10.5		SP-2_43	1.24	244.78	56.5	0.69	1.46										
SP-1_44	1.915	67.8	85.7	31.4	-6.7		SP-2_44	1.27	267.43	38.58	0.64	0.27										
SP-1_45	1.975	139.4	85.5	30.5	-1.9		SP-2_45	1.3	209.28	107.55	1.48	1.96										
SP-1_46	2.025	273.4	74.5	27.7	-0.9		SP-2_46	1.33	122.5	31.89	0.78	0.84										
SP-1_47	2.075	279.5	74.3	27.0	4.1		SP-2_47	1.36	89.4	30.99	1.02	1.01										
							SP-2_48	1.39	88.33	32.3	1.44	1.13										
							SP-2_49	1.41	97.78	48.86	3.84	2.3										
							SP-2_50	1.44	131.6	60.02	2.41	1.17										
							SP-2_51	1.47	162.11	16.99	1.51	0.32										
							SP-2_52	1.5	165.37	15.17	1.16	0.5										
							SP-2_53	1.53	144.18	15.91	1.65	0.34										
							SP-2_54	1.56	99.92	19.83	1.65	0.37										
							SP-2_55	1.59	75.83	70.86	11.29	3.77										
							SP-2_56	1.62	43.94	10.34	7.98	0.93										
							SP-2_57	1.65	37.41	9.24	7.78	0.98										
							SP-2_58	1.68	35.71	10.44	10.95	1.49										
							SP-2_59	1.71	36.55	10.98	11.6	1.64										
							SP-2_60	1.74	44.16	12.49	11.71	1.88										
							SP-2_61	1.77	86.51	58.08	3.07	1.16										
							SP-2_62	1.8	75.48	50.23	2.97	0.69										
							SP-2_63	1.83	39.67	13.26	0.45	0.24										
							SP-2_64	1.86	62.73	14.43	0.44	0.25										
							SP-2_65	1.89	108.38	16.08	0.9	0.28										
							SP-2_66	1.93	153.61	38.48	0.76	0.25										
							SP-2_67	1.96	200.38	70.56	0.28	0.22										
							SP-2_68	1.99	184.51	46.81	0.33	0.21										
							SP-2_69	2.02	187.04	19.78	0.31	0.15										
							SP-2_70	2.05	255.16	81.56	2.54	0.83										
							SP-2_71	2.08	219.96	37.78	0.61	0.35				
						

Snow density profile for the depth range from 0-2.1 m

depth   Density
(cm)    (g/cm3)   
0	0.296
5	0.400
10	0.434
15	0.387
20	0.413
25	0.389
30	0.404
35	0.401
40	0.392
45	0.372
50	0.359
55	0.314
60	0.310
65	0.289
70	0.307
75	0.372
80	0.381
85	0.351
90	0.393
95	0.409
100	0.389
105	0.403
110	0.412
115	0.398
120	0.314
125	0.325
130	0.365
135	0.348
140	0.396
145	0.370
150	0.403
155	0.418
160	0.403
165	0.461
170	0.437
175	0.442
180	0.401
185	0.388
190	0.365
195	0.380
200	0.413
205	0.329


Data for Figure 2: 

Sample  Depth	NO3	Na	Ca
ID	(m)	(ug/l)	(ug/l)	(ug/l)
  
S1	0.01	152.86	11.91	23.57
S2	0.04	164.51	7.40	24.14
S3	0.07	97.94	11.02	19.28
S4	0.09	87.91	12.75	18.85
S5	0.12	60.85	21.95	11.75
S6	0.14	102.90	15.39	12.74
S7	0.17	138.05	11.78	9.52
S8	0.20	120.14	9.04	7.51
S9	0.22	110.27	7.03	8.73
S10	0.25	94.14	4.92	6.96
S11	0.27	87.39	3.94	5.91
S12	0.30	103.21	5.90	6.35
S13	0.32	114.45	6.38	7.47
S14	0.35	150.99	11.65	9.92
S15	0.38	187.57	3.07	7.51
S16	0.40	211.52	1.79	6.31
S17	0.43	195.14	2.17	7.31
S18	0.45	135.41	2.00	7.43
S19	0.48	204.39	1.34	7.18
S20	0.51	126.39	7.74	14.32
S21	0.53	65.14	7.29	17.88
S22	0.56	70.77	5.34	15.03
S23	0.58	73.55	7.76	18.41
S24	0.61	66.59	4.73	10.54
S25	0.63	70.11	4.94	12.81
S26	0.66	71.18	5.59	12.22
S27	0.69	67.42	6.24	10.91
S28	0.71	72.42	6.86	8.26
S29	0.74	92.18	8.00	9.26
S30	0.76	136.64	7.04	7.05
S31	0.79	133.10	4.39	6.84
S32	0.82	105.10	5.04	5.81
S33	0.84	92.65	5.64	7.53
S34	0.87	94.07	6.24	7.40
S35	0.89	91.43	1.74	6.18
S36	0.92	66.58	3.48	5.34
S37	0.94	56.07	2.94	5.39
S38	0.97	99.75	5.29	6.79
S39	1.00	174.22	0.92	6.12
S40	1.03	196.03	1.64	5.84
S41	1.06	193.75	0.50	5.28
S42	1.09	131.26	1.49	7.28
S43	1.12	57.17	1.85	8.08
S44	1.15	76.59	1.97	9.56
S45	1.18	120.38	4.85	19.53
S46	1.22	101.27	3.52	16.83
S47	1.25	104.07	3.99	13.41
S48	1.28	115.36	6.01	12.89
S49	1.31	170.13	11.80	18.11
S50	1.34	210.65	9.08	15.81
S51	1.37	130.27	7.31	10.85
S52	1.41	71.81	9.57	8.31
S53	1.44	46.29	9.81	6.93
S54	1.47	39.08	5.83	5.88
S55	1.50	50.51	2.81	4.83
S56	1.53	92.60	8.72	5.80
S57	1.56	137.84	13.32	6.52
S58	1.59	149.38	10.26	6.29
S59	1.63	92.18	5.09	5.88
S60	1.66	78.45	4.61	5.58
S61	1.69	87.67	2.66	6.34
S62	1.72	107.42	2.07	6.47
S63	1.75	70.66	2.32	5.93
S64	1.78	65.70	3.16	5.05
S65	1.81	224.85	1.74	6.73
S66	1.85	199.83	1.03	6.07
S67	1.88	219.21	1.40	5.48
S68	1.91	189.82	1.81	5.93
S69	1.94	194.55	2.85	11.98
S70	1.97	195.65	5.05	20.67
S71	2.00	170.01	3.39	14.04
S72	2.03	168.63	3.13	13.03
S73	2.06	173.08	2.36	10.21
S74	2.09	146.25	2.72	8.77
S75	2.11	120.77	2.32	12.89
S76	2.14	116.64	2.87	12.37
S77	2.16	131.99	5.17	8.66
S78	2.19	144.84	4.27	6.30
S79	2.22	134.90	6.28	5.76
S80	2.24	127.29	6.90	5.75
S81	2.27	121.64	1.08	4.77
S82	2.29	101.78	0.91	4.68
S83	2.32	82.24	0.20	4.10
S84	2.35	82.75	0.23	3.32
S85	2.37	92.87	0.30	3.43
S86	2.40	103.58	0.54	3.57
S87	2.42	182.36	0.59	4.03
S88	2.45	260.73	0.73	4.55
S89	2.48	280.61	0.50	4.07
S90	2.50	252.42	0.49	4.20
S91	2.53	200.62	0.37	3.66
S92	2.55	176.40	0.17	2.94
S93	2.58	219.59	0.38	4.25
S94	2.61	224.98	2.52	15.58
S95	2.63	181.21	1.88	17.65
S96	2.66	159.15	1.79	17.88
S97	2.68	141.33	1.85	24.01
S98	2.71	106.14	3.46	30.92
S99	2.74	111.63	9.81	67.53
S100	2.76	57.95	5.93	33.54
S101	2.79	94.55	8.67	25.60
S102	2.81	118.90	5.70	13.79
S103	2.84	94.51	0.99	8.51
S104	2.87	92.77	0.95	6.55
S105	2.89	108.02	0.75	6.16
S106	2.92	143.64	1.64	6.53
S107	2.94	130.03	1.74	5.92
S108	2.97	102.04	0.57	4.29
S109	3.00	52.66	0.86	4.17
S110	3.02	38.12	0.79	4.31
S111	3.05	60.66	0.45	4.25
S112	3.08	77.17	0.45	3.76
S113	3.11	83.27	0.25	3.26
S114	3.14	44.52	0.28	3.60
S115	3.17	98.78	0.18	3.68
S116	3.19	164.43	0.34	3.34
S117	3.22	280.56	0.44	4.02
S118	3.25	293.59	1.31	8.11
S119	3.28	202.65	3.11	13.02
S120	3.31	177.00	4.96	17.65
S121	3.34	136.63	26.12	17.20
S122	3.37	155.06	18.51	8.55
S123	3.40	129.40	8.91	6.36
S124	3.43	120.70	9.73	5.02
S125	3.45	116.90	9.37	5.46
S126	3.48	92.96	5.94	5.21
S127	3.51	83.17	2.29	4.21
S128	3.54	89.91	4.66	3.68
S129	3.57	123.42	4.36	3.90
S130	3.60	158.17	3.24	5.01
S131	3.63	144.34	2.57	5.64
S132	3.66	109.50	0.47	4.13
S133	3.68	63.90	0.43	4.00
S134	3.71	73.40	0.56	3.72
S135	3.74	132.70	0.17	3.14
S136	3.77	145.62	1.64	3.51
S137	3.80	214.76	1.13	5.28
S138	3.83	198.33	1.38	8.33
S139	3.86	108.35	1.42	11.00
S140	3.89	89.10	6.94	26.38
S141	3.91	85.84	12.16	39.02
S142	3.94	127.28	19.16	37.65
S143	3.97	217.31	4.21	14.76
S144	4.00	255.78	10.68	10.31
S145	4.03	294.68	10.52	8.34
S146	4.06	232.32	3.01	6.34
S147	4.09	172.25	1.56	5.06
S148	4.12	156.41	3.15	5.02
S149	4.15	138.31	2.43	9.55
S150	4.18	111.93	1.92	9.31
S151	4.21	94.93	0.42	6.15
S152	4.24	91.78	0.37	4.74
S153	4.27	121.04	0.35	4.25
S154	4.30	130.66	0.26	4.30
S155	4.33	100.22	0.31	3.54
S156	4.36	92.54	0.24	2.86
S157	4.39	93.33	0.27	2.62
S158	4.42	148.94	0.43	3.05
S159	4.45	134.57	2.28	6.39
S160	4.48	111.75	6.76	7.33
S161	4.51	78.34	2.27	4.82
S162	4.54	60.99	2.69	4.59
S163	4.57	51.44	2.23	3.20
S164	4.60	48.56	1.44	2.90
S165	4.62	46.73	1.55	2.95
S166	4.65	46.95	1.69	3.26
S167	4.68	46.25	1.06	3.06
S168	4.71	46.64	1.26	2.73
S169	4.74	48.36	1.66	3.13
S170	4.77	57.55	1.19	3.27
S171	4.80	76.35	1.19	3.14
S172	4.83	83.00	0.78	3.03
S173	4.86	89.37	1.65	3.41
S174	4.89	92.51	0.78	3.84
S175	4.92	76.66	0.37	3.35
S176	4.95	75.77	0.40	2.91
S177	4.98	89.95	0.35	2.71
S178	5.01	121.73	1.47	3.31
S179	5.04	156.20	0.35	3.35
S180	5.07	NAN	NAN	NAN
S181	5.10	203.36	0.43	4.49
S182	5.13	152.41	0.86	7.37
S183	5.16	103.31	1.25	11.50
S184	5.19	105.15	6.08	21.22
S185	5.22	144.36	17.74	55.91
S186	5.25	94.03	4.92	23.26
S187	5.28	90.58	2.03	11.47
S188	5.31	94.51	1.51	7.34
S189	5.34	118.65	3.86	6.69
S190	5.37	156.70	1.95	5.56
S191	5.40	138.74	2.72	4.72
S192	5.43	134.10	1.79	3.41
S193	5.46	130.43	0.76	3.32
S194	5.49	159.46	0.37	3.90
S195	5.52	155.17	0.67	3.86
S196	5.55	123.10	0.66	5.44
S197	5.58	82.28	0.58	5.68
S198	5.61	85.02	0.65	7.10
S199	5.64	114.12	0.89	8.85
S200	5.67	119.48	7.67	17.23
S201	5.70	116.18	10.97	26.93
S202	5.73	99.45	36.30	10.73
S203	5.76	142.76	7.01	8.47
S204	5.79	135.94	4.10	5.44
S205	5.82	134.48	12.67	5.03
S206	5.85	160.03	5.08	4.08
S207	5.88	153.84	2.54	3.29
S208	5.91	124.50	0.45	2.58
S209	5.94	107.85	1.01	2.81
S210	5.97	102.20	0.76	4.56
S211	6.00	100.28	2.42	4.84
S212	6.03	97.13	4.91	5.04
S213	6.06	93.83	0.20	2.09
S214	6.09	117.61	0.40	2.46
S215	6.11	152.38	0.50	2.54
S216	6.14	199.71	0.25	1.82
S217	6.17	111.94	0.71	6.15
S218	6.20	194.25	1.89	11.33
S219	6.22	159.07	0.81	6.68
S220	6.25	124.82	4.96	5.22
S221	6.28	118.55	28.54	6.12
S222	6.31	110.75	41.09	6.19
S223	6.33	161.89	13.58	6.33
S224	6.36	154.86	4.05	2.79
S225	6.39	137.86	7.15	2.86
S226	6.42	140.85	3.62	2.56
S227	6.44	110.99	4.41	3.33
S228	6.47	103.35	2.83	3.04
S229	6.50	99.33	0.75	4.66
S230	6.53	101.49	0.47	5.13
S231	6.55	78.00	0.62	5.64
S232	6.58	73.26	0.75	4.39
S233	6.61	77.93	0.63	4.24
S234	6.64	126.66	0.53	2.87
S235	6.66	170.63	1.51	3.86
S236	6.69	159.31	1.37	11.13
S237	6.72	128.01	1.08	16.94
S238	6.74	134.52	2.00	17.12
S239	6.77	153.03	4.68	21.91
S240	6.80	142.82	19.56	12.02
S241	6.83	146.47	13.23	9.74
S242	6.85	144.63	9.43	9.38
S243	6.88	158.22	10.17	11.46
S244	6.91	163.44	18.41	7.04
S245	6.94	165.30	7.77	5.51
S246	6.96	154.28	12.74	4.81
S247	6.99	131.12	4.60	6.10
S248	7.02	125.90	3.04	3.32
S249	7.05	118.24	1.23	3.46
S250	7.07	127.70	3.62	3.45
S251	7.10	123.38	1.20	3.69
S252	7.13	120.69	1.91	3.13
S253	7.16	93.16	0.52	3.00
S254	7.19	88.56	0.70	3.27
S255	7.21	134.34	0.56	3.98
S256	7.24	188.03	0.70	3.20
S257	7.27	184.08	0.35	3.61
S258	7.29	149.68	1.22	8.07
S259	7.32	196.71	2.55	17.97
S260	7.35	211.71	2.31	17.05
S261	7.38	183.99	7.60	18.79
S262	7.40	166.42	13.85	7.84
S263	7.43	152.62	7.35	5.05
S264	7.46	126.16	6.84	3.12
S265	7.49	96.28	2.13	3.55
S266	7.51	87.04	0.70	3.28
S267	7.54	99.19	0.78	4.41
S268	7.57	103.81	0.47	3.86
S269	7.59	105.77	0.31	5.86
S270	7.62	139.32	0.80	8.86
S271	7.65	158.41	1.23	9.59
S272	7.68	174.10	1.91	5.93
S273	7.70	184.23	0.93	5.84
S274	7.73	177.76	1.41	7.57
S275	7.76	149.71	2.99	18.28
S276	7.79	141.73	4.98	23.70
S277	7.81	117.60	3.27	19.47
S278	7.84	136.02	9.14	20.19
S279	7.87	162.63	8.89	24.69
S280	7.89	153.63	14.03	22.60
S281	7.92	135.70	13.26	10.68
S282	7.95	123.43	10.32	6.60
S283	7.98	84.66	10.01	5.11
S284	8.00	76.77	2.30	3.26
S285	8.03	80.16	1.80	5.21
S286	8.06	110.75	1.11	4.25
S287	8.09	163.56	0.49	4.03
S288	8.11	189.09	5.55	7.66
S289	8.14	210.91	3.92	17.72
S290	8.17	192.35	7.57	26.29
S291	8.19	117.54	11.44	23.45
S292	8.22	110.45	31.25	9.78
S293	8.24	116.84	28.50	7.63
S294	8.27	122.99	28.30	5.72
S295	8.29	159.34	24.91	6.13
S296	8.32	161.71	20.96	5.99
S297	8.35	153.85	19.44	8.13
S298	8.37	158.64	5.75	7.48
S299	8.40	140.00	1.72	11.46
S300	8.42	132.71	2.00	19.46
S301	8.45	133.60	3.38	12.91
S302	8.47	149.14	6.32	9.23
S303	8.50	162.91	1.18	7.14
S304	8.52	174.66	4.49	7.31
S305	8.55	198.53	2.57	9.56
S306	8.57	206.88	1.98	9.85
S307	8.60	144.58	3.30	10.85
S308	8.62	124.28	25.38	7.26
S309	8.65	105.12	21.43	6.25
S310	8.67	104.15	21.51	5.89
S311	8.70	128.89	13.31	5.24
S312	8.72	141.56	5.80	3.67
S313	8.75	147.37	4.10	3.84
S314	8.77	149.70	4.29	4.44
S315	8.80	128.09	4.56	5.48
S316	8.82	111.00	5.63	5.20
S317	8.85	85.45	3.50	4.20
S318	8.87	64.90	4.01	4.11
S319	8.90	67.23	1.50	3.98
S320	8.92	94.71	0.36	2.65
S321	8.95	128.32	1.60	3.28
S322	8.98	150.57	0.72	2.99
S323	9.00	170.41	0.77	3.90
S324	9.03	170.01	1.30	4.08
S325	9.05	136.42	2.20	9.25
S326	9.08	118.48	1.98	9.00
S327	9.10	111.23	5.51	17.05
S328	9.13	105.57	30.45	15.46
S329	9.15	139.39	16.06	9.23
S330	9.18	147.74	14.36	7.46
S331	9.20	144.00	13.33	6.07
S332	9.23	136.25	9.57	4.32
S333	9.26	111.03	3.10	4.43
S334	9.28	86.89	1.70	3.88
S335	9.31	81.25	1.40	3.89
S336	9.34	83.01	1.32	3.09
S337	9.37	84.55	1.40	3.58
S338	9.39	95.27	1.52	4.88
S339	9.42	117.68	0.75	4.82
S340	9.45	172.22	1.74	4.59
S341	9.47	182.31	0.74	4.79
S342	9.50	161.13	1.27	9.38
S343	9.53	154.64	1.24	11.88
S344	9.56	132.86	1.33	11.23
S345	9.58	120.46	1.52	13.20
S346	9.61	123.13	1.19	8.60
S347	9.64	127.50	0.91	7.46
S348	9.66	102.70	5.35	7.57
S349	9.69	89.14	4.82	6.24
S350	9.72	94.82	1.41	3.94
S351	9.75	94.55	3.85	4.01
S352	9.77	115.21	5.37	3.90
S353	9.80	121.93	7.22	6.42
S354	9.83	118.32	9.51	7.72
S355	9.85	109.20	4.13	6.75
S356	9.88	95.49	0.98	5.53
S357	9.91	89.80	0.50	4.49
S358	9.94	111.66	0.18	3.78
S359	9.96	139.13	0.53	4.75
S360	9.99	165.49	1.39	9.33
S361	10.02	192.66	4.85	24.68
S362	10.04	215.07	10.57	51.45
S363	10.07	143.10	30.84	42.71
S364	10.10	135.85	18.39	12.51
S365	10.12	134.68	10.27	7.89
S366	10.15	118.61	11.17	5.41
S367	10.18	123.94	12.12	5.73
S368	10.21	132.26	12.62	6.25
S369	10.23	118.32	3.73	7.26
S370	10.26	93.18	1.35	6.17
S371	10.29	91.56	0.13	4.79
S372	10.32	138.98	0.10	3.16
S373	10.34	173.25	0.21	2.48
S374	10.37	172.39	0.89	5.15
S375	10.40	171.29	1.84	10.61
S376	10.43	116.97	2.65	10.94
S377	10.46	64.11	1.46	10.02
S378	10.48	61.63	1.50	9.37
S379	10.51	83.54	4.70	15.11
S380	10.54	106.96	5.72	11.54
S381	10.57	130.89	8.11	12.90
S382	10.59	117.24	8.52	13.10
S383	10.62	127.76	4.64	10.37
S384	10.65	124.17	2.15	5.82
S385	10.68	100.44	1.28	5.61
S386	10.70	94.35	2.25	7.20
S387	10.73	90.04	0.75	5.61
S388	10.76	111.35	1.48	4.56
S389	10.79	139.99	0.58	4.37
S390	10.82	159.87	0.85	4.38
S391	10.84	193.25	0.85	5.27
S392	10.87	190.31	1.17	4.89
S393	10.90	164.28	1.49	9.43
S394	10.93	137.25	1.27	8.52
S395	10.95	109.08	1.31	8.93
S396	10.98	83.76	7.29	15.36
S397	11.01	77.65	11.79	10.78
S398	11.04	89.37	14.43	8.39
S399	11.07	103.60	2.45	5.23
S400	11.09	106.22	1.82	3.57
S401	11.12	112.38	2.46	3.94
S402	11.15	126.47	2.70	3.97
S403	11.18	134.03	3.15	4.21
S404	11.20	131.34	6.49	4.11
S405	11.23	138.20	1.35	3.63
S406	11.26	107.80	1.90	4.32
S407	11.29	58.01	0.89	4.32
S408	11.31	66.22	0.36	3.29
S409	11.34	94.47	0.36	3.93
S410	11.37	113.89	0.52	4.02
S411	11.40	97.39	2.33	9.13
S412	11.43	86.81	4.94	10.37
S413	11.46	73.84	5.38	14.54
S414	11.49	71.64	9.44	12.32
S415	11.51	84.43	11.29	9.08
S416	11.54	81.71	8.78	4.87
S417	11.57	72.09	11.19	4.46
S418	11.60	67.64	12.80	3.88
S419	11.63	70.98	10.23	3.84
S420	11.65	85.56	1.94	3.03
S421	11.68	121.19	0.92	3.36
S422	11.71	154.27	0.41	3.73
S423	11.74	150.86	1.05	8.70
S424	11.77	147.64	1.32	8.84
S425	11.80	145.17	1.62	11.49
S426	11.82	117.49	2.47	14.95
S427	11.85	91.21	10.21	24.95
S428	11.88	83.12	9.01	11.72
S429	11.91	79.11	4.69	10.12
S430	11.94	72.06	4.56	9.53
S431	11.97	80.20	6.37	8.00
S432	11.99	97.40	6.07	5.98
S433	12.02	104.69	2.83	6.62
S434	12.05	110.66	2.77	6.26
S435	12.08	80.17	1.94	5.83
S436	12.11	103.14	0.71	3.83
S437	12.14	108.55	0.69	3.40
S438	12.16	108.95	1.40	3.19
S439	12.19	122.20	2.25	3.41
S440	12.22	129.34	0.73	3.24
S441	12.25	133.86	0.97	6.25
S442	12.28	114.93	1.40	8.47
S443	12.31	91.40	2.56	9.56
S444	12.33	115.16	11.04	25.77
S445	12.35	119.28	4.27	15.99
S446	12.37	98.99	13.93	10.76
S447	12.40	92.62	20.99	6.31
S448	12.42	104.51	5.79	2.92
S449	12.44	79.23	3.51	3.21
S450	12.46	63.36	3.42	2.88
S451	12.48	61.67	8.27	4.06
S452	12.50	67.21	13.23	4.89
S453	12.52	68.72	5.38	7.02
S454	12.54	73.53	6.44	6.92
S455	12.57	76.63	2.78	5.35
S456	12.59	63.67	3.97	5.60
S457	12.61	53.12	5.26	5.18
S458	12.63	52.22	5.02	7.83
S459	12.65	61.88	4.88	4.81
S460	12.67	85.91	4.96	6.65
S461	12.69	83.73	5.13	11.20
S462	12.71	96.64	11.16	15.88
S463	12.74	98.97	16.28	20.62
S464	12.76	99.44	6.82	17.63
S465	12.78	98.30	12.51	22.56
S466	12.80	92.43	9.41	17.03
S467	12.82	54.77	37.01	22.49
S468	12.84	72.68	29.34	16.00
S469	12.86	98.40	8.54	10.20
S470	12.89	119.79	6.26	7.57
S471	12.91	109.19	28.07	12.25
S472	12.93	119.89	35.63	11.23
S473	12.95	125.13	51.83	12.81
S474	12.97	154.77	33.57	10.59
S475	12.99	156.56	12.45	15.53
S476	13.01	143.19	9.12	8.57
S477	13.03	123.11	4.43	8.21
S478	13.06	95.75	3.40	6.52
S479	13.08	107.82	2.47	5.58
S480	13.10	130.83	6.51	7.09
S481	13.12	143.27	9.40	17.47
S482	13.14	168.76	6.69	26.89
S483	13.16	173.77	9.45	26.49
S484	13.18	149.96	13.20	15.28
S485	13.20	137.44	15.81	17.89
S486	13.23	124.74	21.09	11.54
S487	13.25	99.30	12.79	8.36
S488	13.27	85.84	6.83	7.64
S489	13.29	69.58	3.51	7.30
S490	13.31	72.07	1.51	6.12
S491	13.34	74.81	0.91	5.12
S492	13.36	67.16	0.85	4.59
S493	13.39	51.61	1.27	4.86
S494	13.41	165.21	4.11	4.58
S495	13.44	134.72	1.88	5.95
S496	13.46	139.84	0.90	5.59
S497	13.48	141.65	0.39	5.87
S498	13.51	135.23	0.94	8.51
S499	13.53	129.58	1.00	11.15
S500	13.56	126.92	5.81	17.73
S501	13.58	108.84	5.43	22.28
S502	13.61	51.41	22.19	18.70
S503	13.63	84.58	15.73	7.77
S504	13.66	96.03	8.83	7.26
S505	13.68	90.39	7.46	8.66
S506	13.71	93.49	1.87	6.15
S507	13.73	129.74	1.46	6.02
S508	13.75	159.95	1.35	13.32
S509	13.78	150.90	0.86	6.01
S510	13.80	150.19	1.06	5.99
S511	13.83	167.74	1.25	8.70
S512	13.85	168.66	1.44	10.13
S513	13.88	155.91	1.17	11.69
S514	13.90	121.21	14.05	27.99
S515	13.93	103.42	13.59	23.24
S516	13.95	113.24	5.27	10.85
S517	13.97	109.64	9.67	25.45
S518	14.00	106.71	4.30	6.85
S519	14.02	105.11	5.56	7.07
S520	14.05	113.90	4.50	5.73
S521	14.07	109.62	4.91	7.75
S522	14.10	85.11	9.63	5.62
S523	14.12	79.48	2.84	5.10
S524	14.15	93.87	4.06	5.72
S525	14.17	88.10	3.00	5.85
S526	14.20	100.73	2.74	5.32
S527	14.22	109.73	2.45	5.86
S528	14.24	100.65	5.01	13.87
S529	14.27	94.46	3.45	10.49
S530	14.29	82.05	18.23	41.97
S531	14.32	76.41	9.24	22.30
S532	14.34	92.05	5.86	7.73
S533	14.37	100.65	7.95	22.73
S534	14.40	121.09	18.27	10.69
S535	14.42	112.28	16.47	13.35
S536	14.45	108.49	10.62	9.87
S537	14.47	99.69	13.87	12.94
S538	14.50	108.12	2.22	7.58
S539	14.52	123.93	1.31	7.99
S540	14.55	137.70	4.80	8.06
S541	14.57	144.31	2.76	8.33
S542	14.60	133.21	1.46	6.22
S543	14.62	129.38	1.40	6.80
S544	14.65	116.24	6.73	20.75
S545	14.68	95.23	3.47	12.61
S546	14.70	97.51	7.24	12.36
S547	14.73	116.55	9.83	14.37
S548	14.75	119.54	15.65	11.15
S549	14.78	97.64	8.25	15.29
S550	14.80	108.91	30.57	7.60
S551	14.83	115.92	3.97	4.40
S552	14.85	91.59	2.33	3.80
S553	14.88	80.60	14.05	6.16
S554	14.90	90.91	0.49	4.67
S555	14.93	112.02	0.31	4.32
S556	14.95	129.54	0.42	4.58
S557	14.98	128.78	0.47	3.86
S558	15.01	144.56	0.56	5.38
S559	15.03	153.59	0.82	6.37
S560	15.06	139.13	4.41	24.42
S561	15.08	139.78	0.77	5.37
S562	15.11	125.88	6.01	24.18
S563	15.13	131.53	5.47	25.15
S564	15.16	131.16	4.84	17.27
S565	15.18	123.23	3.84	21.44
S566	15.21	146.95	7.25	11.88
S567	15.23	154.23	7.16	10.43
S568	15.26	150.88	3.93	7.17
S569	15.28	138.53	3.38	11.77
S570	15.31	121.58	5.02	5.50
S571	15.34	106.22	14.59	5.69
S572	15.36	131.54	7.49	5.01
S573	15.39	133.55	3.50	6.08
S574	15.41	147.25	0.67	5.20
S575	15.44	165.48	4.94	4.81
S576	15.47	158.66	1.97	8.96
S577	15.49	168.59	5.22	2.43
S578	15.52	171.74	2.63	17.55
S579	15.55	133.44	37.90	17.31
S580	15.57	143.01	9.84	9.46
S581	15.60	135.38	0.77	1.39
S582	15.62	111.25	21.32	8.49
S583	15.65	95.34	22.63	7.09
S584	15.68	99.64	11.97	6.31
S585	15.70	110.46	1.00	2.52
S586	15.73	117.42	3.32	5.94
S587	15.76	84.62	2.13	5.65
S588	15.78	107.14	2.23	5.03
S589	15.81	135.91	3.60	5.42
S590	15.84	122.27	3.44	5.29
S591	15.86	116.83	3.46	4.57
S592	15.89	110.72	1.39	3.80
S593	15.91	107.59	5.42	3.10
S594	15.94	94.48	3.89	5.05
S595	15.97	92.06	3.55	12.53
S596	15.99	77.73	3.07	19.86
S597	16.02	68.44	1.23	1.54
S598	16.05	79.97	1.95	12.45
S599	16.07	103.84	4.09	12.49
S600	16.10	118.47	3.08	8.56
S601	16.12	104.72	0.73	1.25
S602	16.15	90.91	12.53	6.42
S603	16.18	82.26	2.32	4.05
S604	16.20	70.89	3.32	3.14
S605	16.23	81.85	0.41	0.63
S606	16.26	98.53	1.80	3.78
S607	16.28	131.40	1.30	3.53
S608	16.31	126.32	0.71	4.26
S609	16.34	119.23	0.52	0.85
S610	16.36	119.39	6.53	18.88
S611	16.39	113.88	6.51	11.58
S612	16.41	108.58	21.51	33.86
S613	16.44	96.18	0.50	1.65
S614	16.47	124.89	12.08	12.41
S615	16.49	130.35	3.98	9.55
S616	16.52	137.79	2.62	11.45
S617	16.55	149.90	0.73	2.11
S618	16.57	143.80	2.17	7.20
S619	16.60	134.35	1.29	6.74
S620	16.63	113.94	2.04	8.77
S621	16.65	110.34	0.76	1.11
S622	16.68	93.21	12.50	19.31
S623	16.70	91.53	5.34	19.10
S624	16.73	98.60	5.90	19.99
S625	16.76	100.72	0.37	0.71
S626	16.78	125.75	12.08	13.35
S627	16.81	157.56	11.46	8.53
S628	16.83	171.58	8.94	7.31
S629	16.86	169.79	0.79	1.43
S630	16.89	157.88	8.03	6.00
S631	16.91	151.34	3.80	4.95
S632	16.94	120.80	2.34	3.76
S633	16.96	93.14	1.85	2.52
S634	16.99	65.92	0.92	5.04
S635	17.02	69.43	0.54	3.70
S636	17.04	108.06	1.16	4.46
S637	17.07	129.54	0.61	1.90
S638	17.09	141.70	3.15	13.00
S639	17.12	147.96	2.83	18.58
S640	17.15	148.69	5.77	29.16
S641	17.17	123.06	0.63	1.37
S642	17.20	116.10	18.01	42.49
S643	17.23	144.17	9.81	13.74
S644	17.25	154.53	8.75	12.26
S645	17.28	157.29	1.05	2.01
S646	17.30	142.31	2.31	5.99
S647	17.33	126.83	8.77	4.74
S648	17.36	105.12	5.30	5.80
S649	17.38	89.15	1.26	2.16
S650	17.41	103.94	1.57	5.65
S651	17.43	138.52	2.88	4.91
S652	17.46	138.94	1.64	4.47
S653	17.49	141.88	0.32	0.85
S654	17.51	127.69	9.61	17.31
S655	17.54	113.94	7.13	28.82
S656	17.56	91.00	2.81	14.76
S657	17.58	82.73	12.33	8.16
S658	17.61	75.97	10.89	6.74
S659	17.63	80.88	10.81	8.58
S660	17.66	76.14	6.37	4.54
S661	17.68	76.51	2.13	3.96
S662	17.70	64.92	1.52	5.07
S663	17.73	72.46	1.37	4.60
S664	17.75	136.51	1.45	4.11
S665	17.77	128.66	4.02	3.73
S666	17.80	135.45	3.07	6.13
S667	17.82	135.49	2.95	7.52
S668	17.84	112.68	7.33	16.28
S669	17.87	112.44	4.98	12.25
S670	17.89	89.43	12.66	14.20
S671	17.92	91.52	20.54	11.65
S672	17.94	125.33	21.59	14.49
S673	17.96	146.19	6.07	5.69
S674	17.99	148.99	3.68	3.70
S675	18.01	152.84	6.30	3.96
S676	18.03	133.71	6.76	4.18
S677	18.06	90.57	1.88	2.21
S678	18.08	71.17	1.56	2.22
S679	18.11	70.20	5.99	3.27
S680	18.13	99.37	1.22	3.73
S681	18.15	123.80	0.35	2.59
S682	18.18	131.06	0.33	2.43
S683	18.20	139.29	0.70	2.33
S684	18.22	129.73	0.61	4.42
S685	18.25	127.47	2.51	14.99
S686	18.27	121.84	7.28	24.63
S687	18.29	124.65	10.48	21.20
S688	18.32	118.85	11.40	24.03
S689	18.34	112.89	7.52	11.94
S690	18.37	108.33	5.14	8.40
S691	18.39	95.88	3.31	4.31
S692	18.41	77.17	3.09	3.09
S693	18.44	75.65	2.88	2.41
S694	18.46	72.60	1.54	2.29
S695	18.48	82.35	2.48	3.12
S696	18.51	81.11	0.95	3.51
S697	18.54	96.33	0.37	2.29
S698	18.56	115.46	0.26	2.30
S699	18.59	145.46	0.32	2.70
S700	18.62	155.65	0.61	3.98
S701	18.65	158.31	3.54	15.64
S702	18.68	152.62	2.25	8.75
S703	18.71	103.01	6.04	7.64
S704	18.74	80.55	14.77	6.66
S705	18.77	75.69	2.92	3.53
S706	18.80	68.08	2.20	3.80
S707	18.83	69.95	2.60	3.82
S708	18.86	75.03	1.47	3.47
S709	18.88	85.20	0.86	3.58
S710	18.91	90.34	0.36	3.21
S711	18.94	92.58	0.51	3.38
S712	18.97	94.26	0.91	5.24
S713	19.00	82.10	4.25	14.74
S714	19.03	59.32	5.20	12.49
S715	19.06	62.74	1.92	6.09
S716	19.09	71.61	0.63	4.02
S717	19.12	57.12	10.17	6.47
S718	19.15	54.71	16.98	5.44
S719	19.18	77.45	3.85	3.77
S720	19.20	76.76	2.63	3.43
S721	19.23	106.41	2.56	5.18
S722	19.26	118.07	0.64	3.99
S723	19.29	110.85	3.44	17.47
S724	19.32	105.44	5.64	29.98
S725	19.35	104.48	14.48	14.67
S726	19.38	120.08	5.47	8.24
S727	19.41	107.46	5.54	5.89
S728	19.44	103.96	9.97	6.52
S729	19.47	108.06	5.21	5.43
S730	19.50	109.54	0.70	3.92
S731	19.52	113.00	0.54	4.18
S732	19.55	130.82	3.47	4.68
S733	19.58	125.38	4.51	9.87
S734	19.60	111.11	1.42	12.40
S735	19.63	97.56	2.58	9.10
S736	19.66	81.81	3.38	8.29
S737	19.68	88.87	4.28	10.42
S738	19.71	90.65	3.27	10.67
S739	19.74	89.16	4.09	9.40
S740	19.76	89.76	3.21	5.69
S741	19.79	92.07	1.92	3.55
S742	19.82	67.46	3.38	3.33
S743	19.84	54.82	4.99	4.11
S744	19.87	44.77	0.86	3.12
S745	19.89	52.28	1.10	2.82
S746	19.92	56.34	0.93	2.54
S747	19.95	70.52	0.87	3.17
S748	19.97	94.67	0.53	4.64
S749	20.00	334.13	1.03	8.17
S750	20.03	284.15	0.33	10.61
S751	20.05	78.57	0.36	7.15
S752	20.08	80.94	1.10	5.82
S753	20.11	80.43	1.26	7.50
S754	20.13	78.76	2.82	12.62
S755	20.16	67.93	4.70	13.50
S756	20.19	67.05	4.90	10.27
S757	20.21	67.26	2.02	5.19
S758	20.24	55.10	1.83	4.98
S759	20.26	52.00	1.96	3.73
S760	20.29	58.10	1.41	2.57
S761	20.32	64.95	1.99	2.35
S762	20.34	77.81	1.03	2.11
S763	20.37	85.50	1.33	2.40
S764	20.40	84.56	2.30	2.88
S765	20.42	92.49	0.41	2.37
S766	20.45	94.23	0.43	2.24
S767	20.48	97.67	1.32	3.50
S768	20.50	90.40	5.19	12.73
S769	20.53	83.15	4.91	14.71
S770	20.55	70.44	3.73	15.99
S771	20.58	69.09	7.13	8.32
S772	20.60	79.34	9.63	5.66
S773	20.62	96.79	4.32	4.10
S774	20.65	96.48	10.64	5.66
S775	20.67	100.09	3.23	4.38
S776	20.70	89.48	1.93	3.35
S777	20.72	82.82	1.96	2.72
S778	20.75	82.26	0.95	2.54
S779	20.77	88.53	1.47	3.87
S780	20.80	96.68	0.27	3.26
S781	20.82	106.99	0.50	9.48
S782	20.84	115.15	0.81	8.23
S783	20.87	113.69	2.93	13.92
S784	20.89	95.01	8.28	27.87
S785	20.92	79.80	4.19	17.89
S786	20.94	67.60	4.96	11.59
S787	20.97	62.59	7.06	9.26
S788	20.99	71.31	6.61	5.73
S789	21.02	87.07	4.24	3.53
S790	21.04	94.07	3.62	3.55
S791	21.06	91.93	1.07	3.88
S792	21.09	98.53	0.67	3.01
S793	21.11	59.33	1.09	3.49
S794	21.14	83.48	0.68	2.76
S795	21.16	128.55	0.30	2.84
S796	21.19	68.80	0.25	2.46
S797	21.21	78.84	1.65	8.76
S798	21.23	84.79	1.51	12.90
S799	21.26	91.86	1.18	6.08
S800	21.28	96.22	2.11	15.89
S801	21.31	55.15	2.86	16.19
S802	21.33	53.88	13.03	12.99
S803	21.36	68.55	6.59	6.81
S804	21.38	77.69	3.48	5.49
S805	21.41	84.69	5.69	6.50
S806	21.43	92.78	5.23	5.25
S807	21.45	86.75	3.46	5.48
S808	21.48	69.92	1.09	3.87
S809	21.50	71.90	0.42	2.71
S810	21.53	84.26	0.63	2.26
S811	21.56	108.13	0.82	2.22
S812	21.59	125.06	1.09	2.68
S813	21.61	117.32	15.34	32.31
S814	21.64	111.76	11.05	14.29
S815	21.67	106.92	7.06	10.83
S816	21.70	101.69	9.55	9.38
S817	21.72	86.94	7.88	8.32
S818	21.75	72.80	8.56	7.58
S819	21.78	67.85	8.45	6.43
S820	21.81	66.83	1.28	3.99
S821	21.83	70.84	0.50	3.00
S822	21.86	90.62	0.33	2.14
S823	21.89	112.00	0.08	1.74
S824	21.92	111.41	0.29	2.03
S825	21.94	118.44	0.74	4.20
S826	21.97	112.10	0.80	5.90
S827	22.00	87.20	0.99	8.42
S828	22.03	67.99	3.78	13.98
S829	22.05	63.36	4.38	11.29
S830	22.08	51.28	24.66	7.79
S831	22.11	54.28	30.94	7.32
S832	22.14	80.17	5.90	6.28
S833	22.16	76.31	2.93	4.07
S834	22.19	79.19	2.76	4.33
S835	22.22	77.80	3.63	5.10
S836	22.25	74.23	1.09	4.96
S837	22.28	77.51	0.45	3.84
S838	22.30	77.96	0.25	3.11
S839	22.33	77.07	0.41	3.02
S840	22.36	90.65	0.36	3.99
S841	22.39	82.85	0.44	4.50
S842	22.41	69.43	2.53	13.12
S843	22.44	82.62	4.85	20.44
S844	22.47	127.89	7.82	34.89
S845	22.50	104.09	6.69	22.92
S846	22.52	105.90	5.09	7.85
S847	22.55	114.76	2.63	6.91
S848	22.58	90.60	7.76	5.92
S849	22.60	77.24	8.31	5.21
S850	22.63	68.03	6.06	3.16
S851	22.66	62.74	2.46	2.91
S852	22.68	67.27	1.35	3.19
S853	22.71	92.27	3.47	4.45
S854	22.74	118.47	0.58	3.47
S855	22.76	143.30	0.47	3.16
S856	22.79	142.78	1.41	8.07
S857	22.81	158.96	5.59	34.16
S858	22.84	122.20	8.45	16.66
S859	22.87	97.09	10.77	16.97
S860	22.89	82.75	8.34	6.18
S861	22.92	66.94	11.89	4.58
S862	22.95	63.10	5.38	3.06
S863	22.97	55.93	4.25	2.82
S864	23.00	50.29	1.97	4.91
S865	23.03	46.57	2.13	5.63
S866	23.05	63.53	1.45	5.87
S867	23.08	82.03	1.16	5.47
S868	23.10	107.32	0.43	4.93
S869	23.13	105.87	1.48	5.99
S870	23.16	106.68	3.57	13.50
S871	23.18	94.28	3.33	15.22
S872	23.21	67.26	2.19	12.15
S873	23.24	62.87	5.72	11.22
S874	23.26	77.36	9.87	6.00
S875	23.29	69.65	13.16	7.48
S876	23.32	59.86	16.67	6.14
S877	23.34	75.42	3.80	4.11
S878	23.37	75.41	3.65	3.64
S879	23.40	80.24	3.78	3.99
S880	23.42	92.57	4.01	4.96
S881	23.45	101.83	1.18	4.53
S882	23.47	118.09	2.68	3.67
S883	23.50	106.96	3.88	4.46
S884	23.53	96.56	1.62	10.10
S885	23.55	97.37	3.95	17.41
S886	23.58	72.35	7.75	32.42
S887	23.61	42.23	9.47	23.96
S888	23.64	46.70	9.58	12.51
S889	23.66	60.19	3.27	6.13
S890	23.69	74.09	5.55	5.19
S891	23.72	78.05	4.43	6.39
S892	23.74	76.31	3.88	5.94
S893	23.77	81.86	2.03	4.51
S894	23.80	87.13	1.18	3.97
S895	23.82	97.92	1.00	3.72
S896	23.85	105.84	2.24	3.42
S897	23.88	125.61	3.65	4.01
S898	23.90	118.08	4.84	11.76
S899	23.93	121.71	6.84	33.02
S900	23.96	112.19	6.49	41.09
S901	23.98	80.03	7.50	22.73
S902	24.01	60.50	6.03	20.79
S903	24.04	49.73	4.45	15.30
S904	24.06	50.99	2.51	7.63
S905	24.09	57.98	5.50	7.14
S906	24.12	69.76	7.30	5.60
S907	24.14	64.52	5.78	5.27
S908	24.17	59.81	4.89	4.74
S909	24.20	62.18	1.18	4.30
S910	24.22	75.76	0.27	3.27
S911	24.25	91.55	0.31	2.99
S912	24.28	90.90	0.39	4.00
S913	24.31	91.24	0.68	5.33
S914	24.33	97.28	0.78	6.10
S915	24.36	89.53	0.88	7.18
S916	24.39	79.48	1.25	10.68
S917	24.41	82.33	11.52	32.05
S918	24.44	52.88	14.50	31.38
S919	24.47	53.26	6.65	17.86
S920	24.49	51.90	8.45	8.51
S921	24.52	48.51	4.87	8.21
S922	24.55	48.37	2.02	6.50
S923	24.58	48.70	1.00	5.72
S924	24.60	45.30	1.77	5.83
S925	24.63	40.22	12.67	5.54
S926	24.66	47.11	1.68	5.77
S927	24.69	48.20	1.08	4.63
S928	24.72	67.79	1.11	4.02
S929	24.75	90.55	2.74	4.08
S930	24.77	104.90	12.85	7.21
S931	24.80	100.66	15.57	11.05
S932	24.83	102.81	11.91	19.05
S933	24.86	96.36	14.26	18.90
S934	24.89	84.64	13.76	23.93
S935	24.91	62.51	4.99	21.70
S936	24.94	51.93	5.82	14.89
S937	24.97	52.09	3.53	8.75
S938	25.00	52.37	1.10	6.41
S939	25.03	54.55	1.11	5.75
S940	25.06	78.10	2.01	5.46
S941	25.08	89.47	2.52	6.00
S942	25.11	106.10	4.78	9.72
S943	25.14	104.56	5.28	11.18
S944	25.17	94.70	6.50	13.14
S945	25.20	80.21	1.36	11.00
S946	25.22	61.96	11.89	20.11
S947	25.25	70.30	12.46	21.71
S948	25.28	81.79	11.30	18.03
S949	25.31	80.77	11.39	8.26
S950	25.34	79.93	8.68	10.47
S951	25.37	54.87	7.79	9.10
S952	25.39	123.65	2.97	5.75
S953	25.42	79.90	1.34	6.24
S954	25.45	130.77	18.33	6.61
S955	25.48	116.93	3.91	7.60
S956	25.51	133.25	2.20	11.97
S957	25.54	129.57	12.72	44.99
S958	25.56	47.07	10.52	15.12
S959	25.59	54.36	3.55	8.91
S960	25.62	51.28	4.60	7.08
S961	25.65	70.79	2.55	4.78
S962	25.68	88.12	3.81	6.15
S963	25.70	106.84	0.61	4.19
S964	25.73	108.83	0.82	3.67
S965	25.76	116.53	2.87	6.87
S966	25.79	92.51	1.16	4.92
S967	25.81	75.46	10.17	10.82
S968	25.84	64.71	14.56	7.76
S969	25.87	56.92	13.82	5.66
S970	25.90	45.11	12.85	7.71
S971	25.92	47.27	1.97	4.54
S972	25.95	33.90	0.97	5.02
S973	25.98	55.34	1.11	5.71
S974	26.01	87.76	1.34	2.77
S975	26.03	116.46	0.27	5.01
S976	26.06	116.75	0.62	4.02
S977	26.09	113.93	1.82	7.25
S978	26.12	91.16	0.36	3.42
S979	26.14	69.65	4.09	13.33
S980	26.17	47.24	4.13	14.00
S981	26.20	43.76	6.66	9.66
S982	26.23	47.23	3.30	10.59
S983	26.25	50.06	29.84	14.20
S984	26.28	55.59	20.10	12.09
S985	26.31	63.51	8.66	8.07
S986	26.34	59.24	20.74	11.73
S987	26.36	60.97	4.09	6.18
S988	26.39	56.33	9.07	6.56
S989	26.42	64.32	11.69	5.50
S990	26.45	58.96	10.66	5.38
S991	26.47	62.76	0.91	4.52
S992	26.50	71.13	0.49	3.71
S993	26.53	73.95	5.92	25.41
S994	26.56	42.53	1.64	8.51
S995	26.58	52.80	9.39	17.76
S996	26.61	60.27	5.02	8.84
S997	26.63	59.13	5.28	8.09
S998	26.66	53.92	5.04	10.80
S999	26.68	54.55	2.82	7.04
S1000	26.71	50.70	1.74	4.67
S1001	26.73	53.07	2.61	3.34
S1002	26.76	64.83	1.77	4.21
S1003	26.78	81.25	0.60	3.56
S1004	26.81	86.92	0.44	2.95
S1005	26.83	89.69	0.38	2.64
S1006	26.86	74.38	0.38	2.39
S1007	26.88	63.43	0.80	6.86
S1008	26.91	53.40	1.96	10.31
S1009	26.93	55.67	3.01	10.29
S1010	26.96	50.62	1.83	8.27
S1011	26.98	46.01	14.06	10.15
S1012	27.01	41.65	23.06	6.05
S1013	27.03	45.29	10.16	4.52
S1014	27.06	43.88	15.50	5.71
S1015	27.08	50.02	2.38	3.99
S1016	27.11	46.29	1.23	3.98
S1017	27.13	46.16	1.40	4.07
S1018	27.16	38.54	1.16	3.01
S1019	27.18	30.73	0.39	4.01
S1020	27.20	40.68	0.30	3.00
S1021	27.23	60.53	0.22	2.56
S1022	27.25	64.41	0.33	1.97
S1023	27.28	77.15	0.47	2.86
S1024	27.30	83.33	0.34	2.58
S1025	27.33	93.81	0.32	2.35
S1026	27.35	95.76	0.35	1.84
S1027	27.38	103.80	0.80	5.98
S1028	27.40	90.47	1.83	10.59
S1029	27.43	73.74	3.56	15.71
S1030	27.45	71.06	1.83	10.28
S1031	27.48	67.86	9.63	20.47
S1032	27.50	40.13	30.37	11.33
S1033	27.53	50.90	29.47	9.01
S1034	27.55	67.40	3.32	7.44
S1035	27.58	63.92	4.62	6.39
S1036	27.60	52.85	3.71	5.03
S1037	27.63	71.93	1.11	4.20
S1038	27.66	87.66	7.86	4.64
S1039	27.68	109.90	0.62	4.86
S1040	27.71	123.24	0.61	3.82
S1041	27.73	126.73	0.99	3.48
S1042	27.76	124.15	4.58	2.02
S1043	27.79	93.83	5.50	24.20
S1044	27.81	75.67	6.08	26.62
S1045	27.84	66.38	7.78	26.45
S1046	27.87	54.64	16.89	11.34
S1047	27.89	47.29	8.85	6.16
S1048	27.92	45.85	7.53	4.76
S1049	27.95	39.29	3.39	3.26
S1050	27.97	32.49	2.54	2.73
S1051	28.00	28.79	3.76	3.49
S1052	28.02	39.70	5.18	3.69
S1053	28.05	63.63	2.56	2.84
S1054	28.08	113.57	0.93	3.13
S1055	28.10	120.13	1.13	6.66
S1056	28.13	97.40	2.14	9.60
S1057	28.16	43.07	31.01	10.70
S1058	28.18	49.93	23.33	7.47
S1059	28.21	70.97	4.56	4.51
S1060	28.24	55.09	1.33	3.14
S1061	28.26	43.29	1.58	2.53
S1062	28.29	41.67	1.42	2.61
S1063	28.32	34.89	1.37	3.29
S1064	28.34	45.93	1.32	3.80
S1065	28.37	121.10	0.30	3.11
S1066	28.39	128.41	0.61	3.60
S1067	28.42	101.06	0.61	5.65
S1068	28.45	78.26	8.02	15.35
S1069	28.47	56.77	12.24	14.77
S1070	28.50	47.85	3.95	7.80
S1071	28.53	43.75	2.66	7.08
S1072	28.55	38.00	1.48	5.38
S1073	28.58	48.33	4.33	4.27
S1074	28.61	59.16	2.33	4.18
S1075	28.63	57.31	3.96	4.32
S1076	28.66	50.09	2.17	3.77
S1077	28.69	39.80	1.03	3.41
S1078	28.72	55.85	0.77	3.30
S1079	28.74	68.47	0.49	3.85
S1080	28.77	87.07	0.21	3.42
S1081	28.80	86.82	0.66	3.75
S1082	28.83	79.21	1.41	6.35
S1083	28.85	68.59	1.67	9.95
S1084	28.88	50.11	5.92	22.29
S1085	28.91	40.99	2.78	11.06
S1086	28.94	38.30	4.21	7.40
S1087	28.96	43.68	1.82	6.01
S1088	28.99	40.38	2.92	4.48
S1089	29.02	39.87	3.75	4.39
S1090	29.05	38.46	1.30	3.84
S1091	29.07	31.76	0.42	3.65
S1092	29.10	41.76	0.37	3.30
S1093	29.13	66.13	0.20	2.36
S1094	29.16	75.52	0.48	2.95
S1095	29.18	80.37	0.88	6.89
S1096	29.21	63.82	2.70	10.30
S1097	29.24	37.54	10.76	7.51
S1098	29.27	34.72	14.03	5.67
S1099	29.29	36.76	11.48	6.01
S1100	29.32	42.06	4.50	4.34
S1101	29.35	30.19	1.69	3.53
S1102	29.38	20.72	1.40	2.89
S1103	29.40	23.04	1.61	3.70
S1104	29.43	38.78	1.42	4.04
S1105	29.46	49.32	2.50	3.78
S1106	29.49	57.43	0.69	3.92
S1107	29.51	63.06	0.31	3.75
S1108	29.54	70.44	0.34	3.80
S1109	29.57	80.32	0.16	2.96
S1110	29.60	69.78	0.52	3.15
S1111	29.62	64.72	7.95	13.19
S1112	29.65	43.90	8.80	11.38
S1113	29.68	44.50	7.67	7.46
S1114	29.71	39.54	7.32	4.89
S1115	29.74	34.72	4.93	4.97
S1116	29.77	25.70	4.15	4.26
S1117	29.80	61.37	1.46	3.33
S1118	29.83	58.43	0.41	2.81
S1119	29.85	54.62	21.93	3.28
S1120	29.88	67.55	0.19	3.32
S1121	29.91	66.16	1.02	5.45
S1122	29.94	57.44	4.04	15.81
S1123	29.97	48.12	3.74	10.86
S1124	30.00	40.98	3.74	11.55
S1125	30.03	38.48	7.25	15.24
S1126	30.06	37.83	5.51	7.91
S1127	30.08	36.89	2.65	6.78
S1128	30.11	37.67	2.77	5.00
S1129	30.14	37.78	1.44	3.24
S1130	30.17	36.78	2.77	4.45
S1131	30.20	34.15	2.76	5.22
S1132	30.23	48.57	1.51	4.60
S1133	30.26	56.12	0.64	3.84
S1134	30.29	56.61	0.38	3.04
S1135	30.32	61.23	0.63	3.59
S1136	30.34	78.20	4.22	14.98
S1137	30.37	80.27	10.21	26.75
S1138	30.40	66.82	6.62	14.89
S1139	30.43	64.06	6.78	10.84
S1140	30.46	53.45	16.51	10.07
S1141	30.49	103.26	4.53	5.07
S1142	30.52	75.82	1.03	3.66
S1143	30.55	74.34	0.38	3.96
S1144	30.57	82.68	0.29	3.71
S1145	30.60	91.50	1.46	2.85
S1146	30.63	101.99	0.46	3.03
S1147	30.66	84.85	0.45	4.08
S1148	30.69	79.06	0.77	6.43
S1149	30.72	103.87	9.66	28.55
S1150	30.74	91.71	5.72	33.74
S1151	30.77	65.74	5.31	31.13
S1152	30.79	57.98	5.23	14.58
S1153	30.81	57.42	7.41	19.64
S1154	30.84	61.21	4.61	14.09
S1155	30.86	63.71	3.39	8.96
S1156	30.88	66.58	1.92	6.72
S1157	30.91	68.90	0.87	5.44
S1158	30.93	73.92	0.21	4.06
S1159	30.95	69.00	0.43	4.29
S1160	30.98	72.38	1.14	9.99
S1161	31.00	68.35	0.98	12.89
S1162	31.02	62.64	1.38	14.81
S1163	31.05	63.23	5.97	26.53
S1164	31.07	59.24	6.50	42.85
S1165	31.10	42.05	8.13	29.11
S1166	31.12	40.54	11.14	14.01
S1167	31.14	48.16	3.63	9.77
S1168	31.17	48.97	4.46	8.01
S1169	31.19	53.75	1.51	6.03
S1170	31.21	55.34	0.85	4.59
S1171	31.24	65.84	0.93	4.54
S1172	31.26	86.86	0.51	4.53
S1173	31.28	102.60	0.44	3.70
S1174	31.31	108.10	0.17	3.31
S1175	31.33	111.14	1.09	5.51
S1176	31.36	99.29	6.74	20.17
S1177	31.38	73.59	11.84	22.98
S1178	31.40	49.60	14.12	15.31
S1179	31.43	52.34	10.16	9.97
S1180	31.45	62.71	4.47	6.81
S1181	31.47	63.38	4.01	6.69
S1182	31.50	53.40	6.97	6.45
S1183	31.52	50.27	8.51	6.19
S1184	31.54	39.28	8.77	4.21
S1185	31.57	36.52	4.21	3.48
S1186	31.59	36.02	1.72	3.14
S1187	31.61	38.86	4.56	4.11
S1188	31.64	36.51	0.70	3.58
S1189	31.66	36.45	0.34	3.29
S1190	31.69	51.27	0.23	2.72
S1191	31.71	69.90	0.54	2.87
S1192	31.73	87.53	0.82	3.89
S1193	31.76	88.72	1.11	6.66
S1194	31.78	89.22	0.87	7.09
S1195	31.81	70.17	3.95	12.32
S1196	31.84	52.87	12.27	16.12
S1197	31.86	45.23	9.23	18.56
S1198	31.89	43.94	6.33	10.65
S1199	31.91	35.62	4.91	8.09
S1200	31.94	29.39	4.91	6.31
S1201	31.97	24.11	1.76	6.25
S1202	31.99	25.00	2.98	5.30
S1203	32.02	46.45	0.80	5.02
S1204	32.04	40.19	2.72	4.45
S1205	32.07	52.00	1.04	3.96
S1206	32.10	98.42	0.28	3.28
S1207	32.12	129.22	0.23	3.34
S1208	32.15	124.18	0.29	3.35
S1209	32.17	125.61	0.95	6.44
S1210	32.20	132.22	1.63	10.11
S1211	32.23	124.85	3.96	23.65
S1212	32.25	94.50	3.58	21.76
S1213	32.28	64.84	5.65	27.70
S1214	32.30	38.00	7.28	12.36
S1215	32.33	36.28	0.94	8.35
S1216	32.36	39.10	3.72	5.95
S1217	32.38	42.49	14.44	5.76
S1218	32.41	47.04	14.67	5.73
S1219	32.43	50.50	2.81	5.41
S1220	32.46	31.39	0.60	4.46
S1221	32.49	23.76	0.68	4.16
S1222	32.51	37.67	1.01	3.77
S1223	32.54	74.77	0.54	5.41
S1224	32.56	78.95	0.31	5.04
S1225	32.59	82.44	0.08	4.61
S1226	32.62	75.70	0.87	5.79
S1227	32.64	86.65	4.47	24.50
S1228	32.67	87.05	7.19	39.34
S1229	32.69	59.99	6.70	25.46
S1230	32.72	61.68	3.35	12.85
S1231	32.75	59.55	4.27	9.29
S1232	32.77	64.57	2.55	7.22
S1233	32.80	67.53	0.72	5.64
S1234	32.83	64.37	0.48	4.83
S1235	32.86	60.65	0.19	4.43
S1236	32.89	61.40	5.32	15.32
S1237	32.92	55.76	14.36	31.54
S1238	32.94	63.16	15.56	31.56
S1239	32.97	64.43	16.75	25.61
S1240	33.00	64.47	8.90	13.17
S1241	33.03	58.89	10.01	13.90
S1242	33.06	86.31	2.88	7.60
S1243	33.09	111.34	1.07	6.48
S1244	33.11	94.65	0.62	6.88
S1245	33.14	115.97	0.42	5.27
S1246	33.17	77.06	0.65	6.07
S1247	33.20	81.70	1.79	12.36
S1248	33.23	88.31	2.35	12.71
S1249	33.26	63.16	2.33	11.36
S1250	33.29	49.66	3.75	10.61
S1251	33.31	38.77	4.78	9.73
S1252	33.34	37.81	2.01	6.36
S1253	33.37	35.56	3.77	5.72
S1254	33.40	42.68	7.45	4.41
S1255	33.43	51.89	12.69	7.16
S1256	33.46	78.77	1.70	5.46
S1257	33.49	84.99	0.43	4.85
S1258	33.51	112.56	0.52	4.43
S1259	33.54	86.24	0.93	9.19
S1260	33.57	84.11	1.77	16.99
S1261	33.60	75.39	1.63	22.03
S1262	33.63	68.23	1.72	18.91
S1263	33.66	57.05	2.67	21.26
S1264	33.68	64.33	5.33	25.83
S1265	33.71	58.55	5.72	21.68
S1266	33.74	51.62	9.31	12.62
S1267	33.77	60.51	3.20	9.79
S1268	33.80	86.50	1.60	6.71
S1269	33.83	158.20	0.52	5.65
S1270	33.86	125.64	0.28	4.20
S1271	33.88	121.91	0.60	5.55
S1272	33.91	104.65	1.29	8.99
S1273	33.94	88.03	1.52	12.64
S1274	33.97	55.50	6.75	16.11
S1275	34.00	45.40	7.52	15.62
S1276	34.02	39.55	12.78	16.12
S1277	34.05	38.30	10.48	15.53
S1278	34.08	52.11	8.19	8.74
S1279	34.11	49.98	2.08	6.51
S1280	34.14	60.49	1.26	5.51
S1281	34.17	72.16	0.44	4.10
S1282	34.19	86.70	0.24	3.64
S1283	34.22	78.83	0.28	3.93
S1284	34.25	80.67	3.56	19.44
S1285	34.28	81.05	8.49	11.05
S1286	34.31	71.83	10.46	8.18
S1287	34.33	66.00	7.26	6.79
S1288	34.36	62.92	3.29	3.97
S1289	34.39	52.22	1.17	3.49
S1290	34.42	44.31	1.60	2.99
S1291	34.45	47.85	0.58	3.36
S1292	34.47	62.00	0.42	2.92
S1293	34.50	89.11	0.27	2.50
S1294	34.53	58.59	0.26	2.39
S1295	34.56	62.97	0.25	2.97
S1296	34.59	63.34	2.32	9.83
S1297	34.61	58.13	13.05	26.45
S1298	34.64	60.57	18.03	21.54
S1299	34.67	55.17	19.73	12.22
S1300	34.70	62.54	4.76	7.43
S1301	34.73	61.09	0.74	6.60
S1302	34.76	75.22	0.41	4.26
S1303	34.78	75.52	1.60	6.33
S1304	34.81	57.71	7.48	17.28
S1305	34.84	43.07	12.47	17.74
S1306	34.87	38.55	15.09	13.43
S1307	34.90	49.11	3.06	8.37
S1308	34.93	75.77	1.18	4.73
S1309	34.96	94.41	0.67	4.21
S1310	34.99	118.75	0.67	5.03
S1311	35.02	116.21	0.95	8.13
S1312	35.05	116.50	0.96	8.23
S1313	35.08	115.88	0.99	9.72
S1314	35.11	118.10	1.62	10.92
S1315	35.14	89.67	5.13	13.12
S1316	35.16	69.74	9.06	8.82
S1317	35.19	60.50	11.33	9.80
S1318	35.22	58.17	6.74	5.13
S1319	35.25	39.90	3.50	3.98
S1320	35.28	36.57	1.72	3.31
S1321	35.31	40.18	0.79	3.96
S1322	35.34	51.13	0.47	4.20
S1323	35.37	56.41	0.12	3.86
S1324	35.40	57.12	0.35	3.42
S1325	35.43	58.96	0.60	3.97
S1326	35.46	57.66	2.42	8.17
S1327	35.49	41.54	17.45	13.80
S1328	35.52	51.95	12.37	11.47
S1329	35.55	56.14	6.58	9.01
S1330	35.58	57.56	2.40	6.05
S1331	35.61	55.99	2.56	5.03
S1332	35.63	62.26	0.66	5.53
S1333	35.66	87.19	0.53	4.61
S1334	35.69	88.77	0.30	4.18
S1335	35.72	100.10	1.68	8.26
S1336	35.75	80.02	30.34	30.37
S1337	35.78	46.07	23.33	34.36
S1338	35.81	36.19	9.60	13.73
S1339	35.84	28.18	6.30	11.17
S1340	35.87	24.65	1.62	6.89
S1341	35.90	26.75	0.63	4.96
S1342	35.93	39.57	0.34	3.68
S1343	35.96	53.84	0.35	3.47
S1344	35.99	70.25	0.25	3.47
S1345	36.02	90.34	0.28	2.87
S1346	36.05	94.16	0.22	2.84
S1347	36.08	100.99	2.35	8.89
S1348	36.10	92.85	6.23	22.33
S1349	36.13	66.76	12.60	27.47
S1350	36.16	43.30	24.40	24.55
S1351	36.19	54.59	3.57	11.23
S1352	36.22	62.69	0.86	6.67
S1353	36.25	77.17	1.25	7.22
S1354	36.28	106.46	0.52	4.90
S1355	36.31	115.05	0.20	4.63
S1356	36.34	110.77	1.95	10.05
S1357	36.37	146.00	3.27	21.55
S1358	36.40	60.60	11.84	39.42
S1359	36.42	44.34	7.97	25.68
S1360	36.45	50.51	6.09	13.84
S1361	36.48	53.30	8.09	14.63
S1362	36.51	49.28	6.71	11.93
S1363	36.54	97.17	2.04	9.64
S1364	36.57	99.19	0.45	6.40
S1365	36.60	58.31	0.33	6.89
S1366	36.63	69.54	0.43	5.67
S1367	36.66	75.77	5.46	23.24
S1368	36.69	56.80	13.63	29.58
S1369	36.72	52.52	14.74	29.27
S1370	36.74	60.71	12.23	22.07
S1371	36.77	53.21	14.30	23.90
S1372	36.80	43.76	11.10	14.53
S1373	36.83	43.55	14.05	12.76
S1374	36.86	72.04	2.56	8.06
S1375	36.89	77.17	0.53	5.98
S1376	36.92	86.42	0.83	3.48
S1377	36.95	85.11	2.30	19.08
S1378	36.98	65.49	8.31	37.43
S1379	37.01	52.92	2.45	14.22
S1380	37.04	50.64	3.11	14.08
S1381	37.07	43.16	5.43	6.83
S1382	37.09	58.35	3.81	2.06
S1383	37.12	60.19	5.51	1.55
S1384	37.15	57.47	7.22	2.31
S1385	37.18	56.93	1.90	2.95
S1386	37.21	57.77	0.88	1.84
S1387	37.24	61.03	0.55	1.67
S1388	37.27	66.76	0.84	1.89
S1389	37.30	64.95	0.21	1.25
S1390	37.33	70.61	0.50	3.20
S1391	37.36	83.03	0.56	4.15
S1392	37.39	89.81	0.70	5.57
S1393	37.42	95.57	1.64	14.99
S1394	37.45	106.67	16.83	37.85
S1395	37.47	62.68	14.32	11.38
S1396	37.50	55.67	13.85	7.06
S1397	37.53	48.91	3.21	5.19
S1398	37.56	39.98	1.31	3.22
S1399	37.59	25.47	0.65	1.84
S1400	37.62	27.62	2.32	1.60
S1401	37.65	43.96	0.77	1.38
S1402	37.68	79.14	0.56	1.47
S1403	37.71	89.30	0.62	1.44
S1404	37.74	89.40	0.23	1.33
S1405	37.77	89.65	0.39	3.59
S1406	37.79	61.87	2.71	6.16
S1407	37.82	50.25	3.62	5.66
S1408	37.85	46.12	10.14	8.11
S1409	37.88	54.62	1.47	3.67
S1410	37.91	53.92	0.45	2.32
S1411	37.94	69.48	0.61	2.34
S1412	37.97	78.63	0.35	2.15
S1413	38.00	81.87	0.25	2.36
S1414	38.03	87.44	3.43	11.84
S1415	38.06	65.42	12.54	32.42
S1416	38.09	51.57	9.92	20.56
S1417	38.12	44.44	4.25	5.02
S1418	38.15	36.77	3.56	2.59
S1419	38.17	44.48	2.58	2.21
S1420	38.20	59.47	0.25	1.52
S1421	38.23	80.61	0.95	1.36
S1422	38.26	113.76	0.61	1.39
S1423	38.29	123.43	0.32	1.29
S1424	38.32	112.39	0.45	2.79
S1425	38.35	74.52	12.86	11.18
S1426	38.38	85.46	11.82	5.47
S1427	38.41	78.98	9.08	6.10
S1428	38.44	74.84	6.09	5.08
S1429	38.46	70.83	1.37	3.85
S1430	38.49	72.92	0.70	3.04
S1431	38.52	36.27	0.95	2.02
S1432	38.55			
S1433	38.58	55.98		
S1434	38.61	47.31		
S1435	38.64	80.16	1.34	5.20
S1436	38.67	76.36	2.57	11.15
S1437	38.70	66.77	4.03	14.42
S1438	38.73	50.66	4.94	14.72
S1439	38.75	47.63	5.58	10.88
S1440	38.78	40.29	4.30	8.98
S1441	38.81	36.40	5.47	5.71
S1442	38.84	30.48	2.38	3.04
S1443	38.87	24.38	2.08	2.71
S1444	38.90	27.33	1.39	2.41
S1445	38.93	45.59	0.44	2.65
S1446	38.96	63.40	1.57	3.77
S1447	38.99	84.51	0.75	4.26
S1448	39.02	96.98	1.27	12.49
S1449	39.05	95.98	1.69	16.57
S1450	39.08	66.27	3.04	21.92
S1451	39.11	45.39	3.44	12.47
S1452	39.14	33.68	15.59	9.19
S1453	39.17	32.49	5.36	4.75
S1454	39.20	30.67	4.89	5.10
S1455	39.24	36.15	4.65	5.77
S1456	39.27	44.23	0.78	3.29
S1457	39.30	46.43	0.33	1.95
S1458	39.33	45.84	3.22	1.93
S1459	39.36	66.80	1.72	2.13
S1460	39.39	70.69	0.17	1.51
S1461	39.42	74.93	2.65	13.06
S1462	39.45	71.52	3.56	29.59
S1463	39.48	35.11	11.03	11.20
S1464	39.51	28.42	2.21	4.13
S1465	39.55	29.34	1.39	2.66
S1466	39.58	47.74	0.45	1.89
S1467	39.61	79.07	0.41	1.46
S1468	39.64	95.72	0.57	2.54
S1469	39.67	109.81	0.68	4.70
S1470	39.70	103.79	4.42	14.55
S1471	39.73	73.37	6.87	12.56
S1472	39.76	55.79	10.44	9.05
S1473	39.79	47.89	5.70	3.70
S1474	39.83	39.17	2.51	3.38
S1475	39.86	42.75	1.62	2.56
S1476	39.89			
S1477	39.92	120.21	0.55	6.23
S1478	39.95	86.16	0.13	3.27
S1479	39.98	83.09	0.47	2.70
S1480	40.01	85.89	6.81	11.48
S1481	40.04			
S1482	40.08	47.63	15.96	30.25
S1483	40.11	46.65	11.74	10.04
S1484	40.14	47.35	2.09	3.99
S1485	40.17	39.25	1.93	3.56
S1486	40.20	38.68	1.07	2.90
S1487	40.23	56.14	0.51	2.28
S1488	40.26	65.69	0.26	2.00
S1489	40.29	72.25	3.22	6.89
S1490	40.32	71.12	3.05	11.40
S1491	40.35	60.15	3.60	9.09
S1492	40.39	41.53	20.10	8.58
S1493	40.42	40.32	22.33	5.10
S1494	40.45	39.44	11.67	5.31
S1495	40.48	46.96	16.14	3.74
S1496	40.51	80.32	1.80	2.44
S1497	40.54	105.81	0.36	2.82
S1498	40.57	114.54	0.49	2.95
S1499	40.60	118.83	1.53	4.53
S1500	40.63	120.32	6.24	21.01
S1501	40.66	78.49	12.70	20.80
S1502	40.69	52.33	14.27	7.93
S1503	40.72	37.01	15.72	5.17
S1504	40.75	35.71	6.64	3.42
S1505	40.79	31.91	0.92	2.40
S1506	40.82	31.20	0.92	2.31
S1507	40.85	37.10	0.48	2.03
S1508	40.88	55.78	0.36	1.83
S1509	40.91	88.16	0.99	1.65
S1510	40.94	101.42	0.43	2.12
S1511	40.97	109.30	0.75	4.26
S1512	41.00	104.90	0.82	5.60
S1513	41.03	96.17	3.40	21.65
S1514	41.06	75.90	9.08	18.64
S1515	41.09	51.36	3.10	4.80
S1516	41.12	46.66	3.40	3.52
S1517	41.15	62.80	1.68	4.57
S1518	41.18	72.75	0.25	3.22
S1519	41.21	68.54	1.32	4.92
S1520	41.24	53.32	4.81	9.63
S1521	41.27	37.69	11.96	6.67
S1522	41.30	39.75	9.63	7.98
S1523	41.32	60.57	0.87	4.33
S1524	41.35	67.33	0.48	3.02
S1525	41.38	75.02	0.31	3.92
S1526	41.41	80.48	0.71	11.47
S1527	41.44	65.23	1.06	8.64
S1528	41.46	42.91	9.32	13.78
S1529	41.49	47.71	6.26	6.39
S1530	41.52	53.80	4.28	4.90
S1531	41.55	54.53	2.54	2.25
S1532	41.58	51.26	4.96	1.93
S1533	41.61	41.54	0.61	1.81
S1534	41.63	29.95	0.00	1.75
S1535	41.66	28.23	0.16	1.53
S1536	41.69	43.23	0.20	1.29
S1537	41.72	59.59	0.17	1.63
S1538	41.75	71.36	0.08	1.14
S1539	41.78	69.14	0.35	1.36
S1540	41.80			
S1541	41.83	67.34	1.84	9.91
S1542	41.86	70.09	1.95	16.85
S1543	41.89	65.77	5.00	21.24
S1544	41.92	50.35		
S1545	41.95	43.77	8.66	14.23
S1546	41.97	42.33	7.41	10.06
S1547	42.00	43.35	1.49	2.97
S1548	42.03	40.86	1.26	3.48
S1549	42.06	51.89	0.74	2.75
S1550	42.09	61.60	1.17	2.52
S1551	42.12	72.30	0.53	2.18
S1552	42.14	90.30	0.16	1.58
S1553	42.16	84.84	0.26	2.13
S1554	42.19	90.08	0.35	2.95
S1555	42.21	75.92	0.86	5.84
S1556	42.23	77.84	4.87	17.15
S1557	42.25	84.53	5.34	21.22
S1558	42.27	78.08	3.55	12.84
S1559	42.29	75.47	1.92	5.22
S1560	42.32	73.52	1.75	3.91
S1561	42.34	74.25	1.80	3.56
S1562	42.36	72.21	2.38	3.48
S1563	42.38	63.73	3.27	2.84
S1564	42.40	54.57	2.76	1.95
S1565	42.43	35.97	23.66	3.73
S1566	42.45	33.55	12.22	4.26
S1567	42.47	30.89	1.34	2.54
S1568	42.49	29.14	0.71	1.57
S1569	42.51	36.43	6.53	3.19
S1570	42.53	51.24	4.47	4.97
S1571	42.56	74.14	4.13	2.75
S1572	42.58	88.32	0.48	1.81
S1573	42.60	107.20	1.05	4.93
S1574	42.62	129.68	1.02	9.27
S1575	42.64	90.87	6.06	8.52
S1576	42.66	70.94	10.05	9.02
S1577	42.69	57.25	9.02	4.96
S1578	42.71	45.66	8.27	5.34
S1579	42.73	32.41	11.42	3.90
S1580	42.75	33.61	7.09	4.26
S1581	42.77	36.74	5.51	5.62
S1582	42.80	41.65	5.09	6.36
S1583	42.82	50.22	1.02	3.56
S1584	42.84	54.89	0.71	3.98
S1585	42.86	59.88	0.18	2.96
S1586	42.88	61.18	0.21	2.53
S1587	42.90	79.25	1.50	17.55
S1588	42.93	79.19	2.81	20.11
S1589	42.95	78.14	2.87	22.31
S1590	42.97	60.67	13.36	37.98
S1591	42.99	49.93	14.71	16.31
S1592	43.01	53.96	5.31	6.57
S1593	43.04	55.62	9.72	4.22
S1594	43.06	64.50	5.40	4.58
S1595	43.08	48.99	4.08	4.08
S1596	43.10	64.34	1.50	4.81
S1597	43.12	81.12	4.30	3.06
S1598	43.14	70.18	2.82	2.67
S1599	43.17	72.63	0.14	2.03
S1600	43.20	59.44	0.11	1.43
S1601	43.22	71.65	3.08	11.61
S1602	43.25	60.83	6.56	30.08
S1603	43.28	35.53	21.85	23.75
S1604	43.31	30.40	6.62	8.83
S1605	43.34	26.79	1.76	5.17
S1606	43.36	25.45	1.92	4.62
S1607	43.39	31.17	1.84	2.75
S1608	43.42	36.93	1.03	2.28
S1609	43.45	46.33	0.65	2.48
S1610	43.47	57.51	0.42	2.22
S1611	43.50	163.57	0.34	2.76
S1612	43.53	139.67	0.46	4.03
S1613	43.56	94.17	0.79	8.08
S1614	43.58	64.72	13.60	11.49
S1615	43.61	55.44	6.32	5.06
S1616	43.64	40.58	4.56	3.30
S1617	43.67	28.48	15.97	5.60
S1618	43.70	33.29	2.81	3.17
S1619	43.72	30.54	5.73	2.33
S1620	43.75	34.93	1.89	1.46
S1621	43.78	69.18	1.34	2.26
S1622	43.81	72.58	0.48	2.65
S1623	43.83	75.17	0.16	2.22
S1624	43.86	61.35	0.18	2.20
S1625	43.89	53.51	0.95	6.63
S1626	43.92	55.62	0.35	6.30
S1627	43.95	47.75	2.34	10.30
S1628	43.97	45.23	4.49	22.32
S1629	44.00	24.75	18.31	14.78
S1630	44.03	31.35	7.79	7.70
S1631	44.06	35.49	7.05	3.73
S1632	44.08	24.06	24.07	3.02
S1633	44.11	38.08	9.18	3.03
S1634	44.14	41.55	1.98	3.00
S1635	44.17	48.97	0.34	2.41
S1636	44.20			
S1637	44.23	113.41	0.40	5.96
S1638	44.26	58.09	0.51	8.24
S1639	44.28	65.72	1.16	15.87
S1640	44.31	61.52	4.22	20.18
S1641	44.34	54.92	5.36	22.25
S1642	44.37	49.32	8.27	18.18
S1643	44.40	46.20	10.74	14.01
S1644	44.43	39.42	12.20	8.26
S1645	44.46	43.55	4.23	5.56
S1646	44.49	57.80	0.53	4.94
S1647	44.52	132.55	0.37	4.80
S1648	44.55	94.07	0.55	4.75
S1649	44.58	86.26	0.54	5.18
S1650	44.61	91.88	0.65	6.79
S1651	44.64	89.07	2.96	17.64
S1652	44.67	58.57	15.53	22.05
S1653	44.70	46.90	3.78	7.44
S1654	44.73	42.09	7.27	6.30
S1655	44.76	53.80	6.16	4.21
S1656	44.79	70.82	6.46	4.14
S1657	44.82	92.00	1.59	3.51
S1658	44.85	118.82	0.51	3.58
S1659	44.88	113.62	2.14	19.63
S1660	44.91	90.36	2.82	21.37
S1661	44.94	67.66	5.80	22.32
S1662	44.97	48.06	8.50	14.92
S1663	45.00	42.65	3.07	5.98
S1664	45.03	39.85	4.04	7.59
S1665	45.06	46.43	0.67	4.09
S1666	45.09	54.76	0.16	3.55
S1667	45.12	71.57	0.28	2.88
S1668	45.15	90.33	2.58	8.91
S1669	45.18	58.15	4.12	23.50
S1670	45.21	35.49	1.70	15.68
S1671	45.24	35.62	4.58	15.37
S1672	45.27	31.31	12.83	13.24
S1673	45.30	27.90	12.16	8.75
S1674	45.33	29.79	3.82	5.91
S1675	45.36	38.24	1.40	3.44
S1676	45.40	59.55	0.61	3.58
S1677	45.43	75.07	0.45	6.39
S1678	45.46	74.47	1.15	4.01
S1679	45.49	67.33	6.06	12.31
S1680	45.52	56.87	8.27	12.01
S1681	45.55	55.71	8.53	19.22
S1682	45.59	48.38	10.26	14.91
S1683	45.62	36.39	14.40	12.36
S1684	45.65	28.47	8.20	5.43
S1685	45.68	32.12	5.08	3.66
S1686	45.71	46.49	4.10	3.79
S1687	45.74	74.31	1.91	2.66
S1688	45.77	82.57	0.33	2.19
S1689	45.81	88.71	1.86	11.80
S1690	45.84	83.66	1.79	16.45
S1691	45.87	53.00	4.46	15.92
S1692	45.90	37.06	14.67	14.05
S1693	45.93	32.89	10.65	16.40
S1694	45.96	34.91	12.32	12.58
S1695	46.00	20.77	0.85	5.20
S1696	46.03	40.47	0.52	5.32
S1697	46.06	60.85	0.58	11.92
S1698	46.09	102.00	35.28	6.65
S1699	46.12	106.87	0.49	5.59
S1700	46.15	103.81	0.53	7.51
S1701	46.19	93.96	1.76	22.53
S1702	46.22	76.44	0.92	16.02
S1703	46.25	38.83	13.20	13.47
S1704	46.28	33.62	10.46	9.83
S1705	46.31	20.99	16.79	8.31
S1706	46.34	21.11	1.65	4.62
S1707	46.37	23.03	1.07	2.78
S1708	46.40	29.53	1.02	2.10
S1709	46.43	42.78	0.83	3.30
S1710	46.46	52.81	0.71	3.87
S1711	46.49	58.37	0.69	4.07
S1712	46.52	67.25	1.26	6.55
S1713	46.55	65.33	2.73	14.51
S1714	46.58	64.99	4.83	25.72
S1715	46.61	39.85	4.39	9.98
S1716	46.64	31.69	6.55	9.61
S1717	46.67	27.45	3.19	6.81
S1718	46.70	29.11	1.23	4.65
S1719	46.73	33.86	6.99	3.52
S1720	46.76	36.59	3.67	2.63
S1721	46.79	47.86	1.88	3.06
S1722	46.82	57.58	0.53	8.09
S1723	46.85	72.99	0.46	5.98
S1724	46.88	77.38	1.50	10.34
S1725	46.91	71.26	3.60	16.82
S1726	46.94	60.32	5.55	14.51
S1727	46.97	35.06	15.20	14.20
S1728	47.00	32.22	1.39	5.44
S1729	47.03	29.31	1.94	4.71
S1730	47.06	29.54	2.33	3.85
S1731	47.09	62.85	0.97	2.67
S1732	47.12	145.59	0.47	2.02
S1733	47.15	68.20	0.43	3.38
S1734	47.18	72.04	1.19	9.89
S1735	47.21	84.36	9.11	23.35
S1736	47.24	62.38	23.35	41.82
S1737	47.27	41.38	16.10	13.08
S1738	47.30	50.30	2.68	10.76
S1739	47.33	57.52	1.32	6.29
S1740	47.36	62.18	0.37	4.31
S1741	47.38	74.05	0.08	2.93
S1742	47.41	82.49	1.79	2.78
S1743	47.44	92.68	1.45	10.20
S1744	47.47	106.47	1.76	11.64
S1745	47.50	105.16	11.30	46.39
S1746	47.52	92.34	15.92	42.63
S1747	47.55	65.29	6.38	6.80
S1748	47.58	64.01	7.21	4.42
S1749	47.61	74.65	10.51	3.90
S1750	47.64	94.35	1.45	3.11
S1751	47.67	102.06	0.33	2.91
S1752	47.69	102.77	0.45	4.17
S1753	47.72	99.78	0.73	7.35
S1754	47.75	99.91	3.67	21.35
S1755	47.78	60.76	4.51	20.90
S1756	47.81	51.28	3.20	8.52
S1757	47.83	46.04	2.55	5.21
S1758	47.86	39.72	15.13	5.43
S1759	47.89	34.02	18.41	3.59
S1760	47.92			
S1761	47.95	34.69	5.18	3.31
S1762	47.97	34.40	1.75	2.33
S1763	48.00	40.41	1.72	2.31
S1764	48.03	43.67	0.95	1.99
S1765	48.06	48.37		
S1766	48.09	57.95	0.17	1.94
S1767	48.11	83.58	0.74	8.71
S1768	48.14	66.06	0.95	6.70
S1769	48.17	62.16	1.66	12.67
S1770	48.20	50.46	12.62	17.46
S1771	48.23	33.48	3.54	6.35
S1772	48.26	49.43	4.79	7.65
S1773	48.28	67.96	2.70	5.56
S1774	48.31	81.66	0.96	5.81
S1775	48.34	84.73	1.35	8.29
S1776	48.37	81.67	2.34	12.77
S1777	48.41	61.77	14.36	15.98
S1778	48.44	53.14	14.13	16.59
S1779	48.47	31.13	12.17	9.01
S1780	48.50	30.73	5.83	8.35
S1781	48.53	29.14	1.92	5.24
S1782	48.57	27.56	1.17	5.74
S1783	48.60	39.33	0.35	3.62
S1784	48.63	64.69	0.35	2.43
S1785	48.66	92.93	0.43	4.01
S1786	48.69	94.69	1.23	8.62
S1787	48.73	68.81	1.50	8.52
S1788	48.76	55.30	12.41	18.10
S1789	48.79	51.52	5.98	6.44
S1790	48.82	47.93	7.79	5.77
S1791	48.85	42.38	0.83	3.78
S1792	48.89	49.75	0.44	2.78
S1793	48.92	71.88	0.15	2.37
S1794	48.95	82.18	0.16	2.12
S1795	48.98	88.06	1.33	6.41
S1796	49.01	89.08	1.82	17.38
S1797	49.05	73.98	4.92	15.98
S1798	49.08	63.36	7.10	17.37
S1799	49.11	40.57	9.82	13.75
S1800	49.14	27.73	16.27	10.65
S1801	49.17	27.24	4.98	5.98
S1802	49.21	26.80	5.31	6.13
S1803	49.24	43.08	1.56	4.75
S1804	49.27	58.42	0.60	5.00
S1805	49.30	70.82	0.74	7.66
S1806	49.33	73.82	1.57	15.44
S1807	49.36	34.32	15.59	16.20
S1808	49.39	42.08	35.75	47.00
S1809	49.42	35.90	4.04	16.49
S1810	49.45	30.26	0.60	11.17
S1811	49.48	33.07	0.52	5.89
S1812	49.51	44.04	1.02	5.30
S1813	49.53	54.91	1.40	4.67
S1814	49.56	67.14	0.38	5.05
S1815	49.59	88.36	0.29	3.56
S1816	49.62	97.97	0.83	9.37
S1817	49.65	90.50	0.96	9.27
S1818	49.67	78.07	0.94	12.03
S1819	49.70	67.75	1.99	11.71
S1820	49.73	44.12	1.20	6.05
S1821	49.76	30.76	3.54	6.86
S1822	49.79	31.16	5.87	12.60
S1823	49.81	39.42	10.81	17.48
S1824	49.84	45.92	3.63	8.07
S1825	49.87	58.52	0.58	4.04
S1826	49.90	67.70	0.13	4.22
S1827	49.93	77.21	0.33	3.61
S1828	49.95	83.36	0.98	8.83
S1829	49.98	80.38	6.94	17.22
S1830	50.01	52.66	8.84	11.52
S1831	50.04	40.91	10.32	8.24
S1832	50.07	28.46	17.16	8.87
S1833	50.10	31.69	0.98	3.34
S1834	50.12	32.23	1.11	3.56
S1835	50.15	40.16	0.41	2.82
S1836	50.18	47.82	0.29	1.97
S1837	50.21	55.03	0.10	1.52
S1838	50.24	58.29	0.15	2.10
S1839	50.26	67.02	1.10	7.91
S1840	50.29	68.25	1.72	17.40
S1841	50.32	66.48	5.11	19.55
S1842	50.35	53.10	14.89	21.96
S1843	50.38	45.24	9.75	13.87
S1844	50.40	50.70	2.47	9.63
S1845	50.43	61.78	0.52	4.71
S1846	50.46	67.27	0.21	4.84
S1847	50.49	76.92	0.35	3.21
S1848	50.52	81.77	0.27	2.64
S1849	50.55	80.46	1.06	7.74
S1850	50.58	70.50	1.59	15.73
S1851	50.60	42.54	11.06	23.78
S1852	50.63	39.31	20.45	36.33
S1853	50.66	42.49	10.83	8.41
S1854	50.69	34.97	3.85	6.39
S1855	50.72	29.27	8.07	5.65
S1856	50.74	34.60	3.09	4.40
S1857	50.77	49.68	1.09	3.01
S1858	50.80	49.30	0.15	3.03
S1859	50.83	69.22	3.18	10.88
S1860	50.86	75.40	3.93	23.37
S1861	50.89	77.10	3.64	22.93
S1862	50.91	65.06	3.49	18.21
S1863	50.94	43.27	19.69	12.34
S1864	50.97	39.59	22.49	8.83
S1865	51.00	38.85	22.39	6.19
S1866	51.03	50.61	5.28	4.86
S1867	51.06	67.16	1.19	3.12
S1868	51.08	69.72	3.00	3.50
S1869	51.11	70.49	1.63	3.36
S1870	51.14	63.33	0.21	3.09
S1871	51.17	64.50	0.44	2.48
S1872	51.20	68.01	0.98	8.86
S1873	51.23	71.81	4.37	25.13
S1874	51.25	56.59	5.96	17.84
S1875	51.28	46.37	11.51	15.10
S1876	51.31	45.33	3.86	7.79
S1877	51.34	29.86	30.57	6.71
S1878	51.37	44.66	2.96	4.77
S1879	51.40	50.34	1.74	4.07
S1880	51.43	58.99	0.39	2.72
S1881	51.45	64.39	0.64	3.15
S1882	51.48	81.71	0.26	3.05
S1883	51.51	88.07	0.76	5.48
S1884	51.54	69.11	2.48	5.38
S1885	51.57	64.05	4.59	3.65
S1886	51.59	44.77	6.42	4.99
S1887	51.62	77.41	3.61	3.81
S1888	51.65	26.15	0.24	2.34
S1889	51.68	38.93	0.08	1.77
S1890	51.71	60.89	0.16	1.80
S1891	51.74	80.29	0.36	2.26
S1892	51.76	89.45	1.05	12.11
S1893	51.79	99.19	0.97	10.32
S1894	51.82	92.21	1.46	13.25
S1895	51.85	85.93	3.23	14.22
S1896	51.88	53.58	17.15	19.55
S1897	51.90	53.75	18.25	16.36
S1898	51.93	43.21	3.72	9.63
S1899	51.96	39.03	1.68	6.83
S1900	51.99	39.70	2.31	5.98
S1901	52.02	43.76	2.39	5.67
S1902	52.05	52.91	1.77	4.38
S1903	52.07	72.27	0.33	3.51
S1904	52.10	225.59	2.95	25.10
S1905	52.13	69.47	1.56	18.82
S1906	52.16	34.73	4.37	18.36
S1907	52.19	35.22	3.79	15.98
S1908	52.22	43.70	9.19	21.83
S1909	52.24	49.69	26.24	30.69
S1910	52.27	36.31	12.55	28.18
S1911	52.30	25.76	4.64	13.63
S1912	52.33	45.54	11.05	8.24
S1913	52.36	52.07	0.62	4.83
S1914	52.38	83.24	0.19	4.82
S1915	52.41	104.62	1.06	9.03
S1916	52.44	72.02	2.54	18.30
S1917	52.47	58.62	10.28	16.24
S1918	52.50	41.18	2.41	8.12
S1919	52.52	34.60	1.00	4.73
S1920	52.55	31.47	1.14	5.36
S1921	52.58	36.09	3.59	14.59
S1922	52.60	119.14	0.29	7.83
S1923	52.63	167.38	0.27	6.02
S1924	52.66	178.08	0.42	4.85
S1925	52.68	209.90	0.59	4.39
S1926	52.71	102.65	1.13	8.80
S1927	52.74	87.71	4.99	19.36
S1928	52.77	63.67	10.77	22.36
S1929	52.79	54.95	18.80	14.14
S1930	52.82	39.00	8.92	9.25
S1931	52.85	30.22	3.35	4.57
S1932	52.87	32.45	2.15	3.09
S1933	52.90	38.45	0.89	3.19
S1934	52.93	50.03	0.37	2.92
S1935	52.95	67.97	0.45	3.76
S1936	52.98	75.28	0.44	2.92
S1937	53.01	80.72	0.78	8.08
S1938	53.03	83.83	9.56	27.10
S1939	53.06	69.87	6.79	22.53
S1940	53.09	54.97	1.89	8.13
S1941	53.12	52.83	4.39	4.33
S1942	53.14	56.64	2.34	4.35
S1943	53.17	92.02	0.74	4.07
S1944	53.20	71.27	0.44	3.48
S1945	53.22	70.38	1.75	9.54
S1946	53.25	54.50	3.19	13.06
S1947	53.28	36.17	1.89	6.64
S1948	53.30	26.67	9.97	4.66
S1949	53.33	25.84	23.87	3.98
S1950	53.36	31.92	16.43	3.96
S1951	53.38	35.54	18.53	4.43
S1952	53.41	65.25	0.84	2.78
S1953	53.44	51.77	0.63	3.34
S1954	53.46	43.94	0.65	7.55
S1955	53.49	47.59	1.79	11.51
S1956	53.52	43.98	8.21	19.61
S1957	53.55	40.08	9.16	17.14
S1958	53.58	30.29	5.26	12.13
S1959	53.60	38.09	1.63	7.10
S1960	53.63	54.68	1.15	5.16
S1961	53.66	65.97	0.40	3.38
S1962	53.69	84.94	0.75	5.31
S1963	53.71	99.13	0.25	3.43
S1964	53.74	122.07	1.13	13.74
S1965	53.77	107.71	4.07	25.30
S1966	53.80	45.87	4.50	19.12
S1967	53.82	37.41	12.37	21.05
S1968	53.85	28.92	10.42	7.32
S1969	53.88	28.00	11.90	5.83
S1970	53.91	39.55	9.25	6.72
S1971	53.93	34.18	1.55	8.56
S1972	53.96	60.50	0.55	4.71
S1973	53.99	63.91	0.26	3.04
S1974	54.02	134.66	0.06	2.42
S1975	54.04	168.47	0.02	3.44
S1976	54.07	95.02	0.93	8.04
S1977	54.10	113.38	5.77	21.79
S1978	54.13	85.10	9.99	22.48
S1979	54.15	65.51	18.50	10.33
S1980	54.18	49.24	26.65	8.32
S1981	54.21	52.52	8.95	9.98
S1982	54.24	43.95	2.06	7.39
S1983	54.27	38.71	2.24	6.20
S1984	54.29	46.08	5.34	8.94
S1985	54.32	40.68	1.14	5.55
S1986	54.35	48.43	0.27	5.05
S1987	54.38	64.18	0.17	3.97
S1988	54.40	67.67	0.31	3.25
S1989	54.43	72.11	4.84	21.74
S1990	54.46	67.61	5.48	22.78
S1991	54.49	59.47	4.70	16.74
S1992	54.51	37.70	8.14	13.13
S1993	54.54	33.60	4.45	5.58
S1994	54.57	42.97	3.08	5.25
S1995	54.60	69.50	1.76	4.47
S1996	54.63	79.48	0.67	5.99
S1997	54.65	79.39	2.35	16.55
S1998	54.68	70.15	1.21	17.49
S1999	54.71	38.53	3.59	18.26
S2000	54.74	36.21	3.95	9.39
S2001	54.76	31.11	9.40	8.63
S2002	54.79	25.77	12.45	6.68
S2003	54.82	28.33	11.17	5.46
S2004	54.85	31.89	3.25	5.05
S2005	54.88	32.44	1.31	4.95
S2006	54.90	39.32	0.30	4.73
S2007	54.93	57.53	0.41	4.04
S2008	54.96	72.92	0.20	2.73
S2009	54.99	73.82	0.84	3.61
S2010	55.01	76.26	2.59	18.01
S2011	55.04	71.87	7.02	23.22
S2012	55.07	51.45	9.16	21.12
S2013	55.10	49.26	13.35	14.57
S2014	55.13	47.67	14.25	12.57
S2015	55.15	59.65	16.55	9.75
S2016	55.18	75.53	1.01	6.09
S2017	55.21	79.91	0.56	6.96
S2018	55.24	72.53	0.18	4.71
S2019	55.27	73.77	0.24	4.39
S2020	55.29	59.15	0.62	4.46
S2021	55.32	56.28	1.16	5.81
S2022	55.35	47.02	0.99	7.84
S2023	55.38	43.26	20.80	32.62
S2024	55.40	32.06	2.18	10.10
S2025	55.43	34.25	1.15	5.23
S2026	55.46	52.93	0.39	5.50
S2027	55.49	66.07	0.33	3.40
S2028	55.52	71.55	2.69	3.03
S2029	55.54	68.40	2.43	6.51
S2030	55.57	51.25	2.87	16.88
S2031	55.60	44.12	3.45	18.43
S2032	55.63	34.63	16.84	21.42
S2033	55.65	35.82	14.81	18.39
S2034	55.68	38.65	18.23	22.86
S2035	55.70	37.26	14.28	20.16
S2036	55.73	36.78	3.19	12.90
S2037	55.76	44.16	2.59	10.97
S2038	55.78	60.94	0.25	7.34
S2039	55.81	73.56	0.22	5.33
S2040	55.84	83.69	0.35	4.00
S2041	55.86	88.76	0.88	7.52
S2042	55.89	103.56	1.23	14.35
S2043	55.91	83.54	3.95	26.65
S2044	55.94	81.40	50.86	37.74
S2045	55.97	55.56	23.74	29.95
S2046	55.99	33.87	2.25	11.79
S2047	56.02	26.10	2.29	6.86
S2048	56.05	32.58	2.45	4.84
S2049	56.07	42.18	0.99	4.58
S2050	56.10	55.24	0.26	3.94
S2051	56.12	64.50	0.43	3.81
S2052	56.15	67.08	0.36	3.48
S2053	56.18	69.37	2.43	26.12
S2054	56.20	82.63	4.07	22.61
S2055	56.23	82.89	5.63	22.61
S2056	56.26	62.03	2.50	19.58
S2057	56.28	51.44	4.09	11.61
S2058	56.31	39.50	3.80	12.04
S2059	56.33	30.87	7.59	7.59
S2060	56.36	32.42	0.79	4.54
S2061	56.39	34.18	0.83	4.43
S2062	56.41	34.28	0.87	4.91
S2063	56.44	40.28	1.69	4.42
S2064	56.46	44.58	0.35	3.87
S2065	56.49	43.28	0.63	3.33
S2066	56.52	54.54	0.45	4.17
S2067	56.54	65.81	0.64	6.37
S2068	56.57	64.86	8.05	14.94
S2069	56.60	52.43	11.63	8.65
S2070	56.63	44.39	8.90	8.23
S2071	56.65	43.92	9.71	5.12
S2072	56.68	42.11	5.50	3.48
S2073	56.71	39.39	2.98	2.67
S2074	56.74	40.90	3.41	2.93
S2075	56.76	59.22	0.68	2.77
S2076	56.79	82.86	0.29	3.05
S2077	56.82	108.13	0.74	14.11
S2078	56.85	121.22	0.89	21.09
S2079	56.88	106.38	6.76	36.32
S2080	56.90	93.86	10.02	31.12
S2081	56.93	86.94	16.74	40.46
S2082	56.96	56.29	3.33	17.65
S2083	56.99	44.27	5.79	9.31
S2084	57.01	50.54	2.02	5.88
S2085	57.04	50.01	0.79	4.75
S2086	57.07	79.86	1.01	5.03
S2087	57.10	71.93	0.95	5.47
S2088	57.12	52.70	1.05	13.49
S2089	57.15	46.82	2.26	15.43
S2090	57.18	36.66	2.53	16.66
S2091	57.21	32.98	6.04	16.00
S2092	57.24	37.45	1.18	9.01
S2093	57.26	34.41	15.20	10.78
S2094	57.29	39.28	5.21	7.67
S2095	57.32	47.13	4.92	7.09
S2096	57.35	44.15	7.09	7.47
S2097	57.37	48.29	2.14	6.57
S2098	57.40	53.30	0.45	5.63
S2099	57.43	59.67	1.77	8.34
S2100	57.46	51.43	8.03	19.55
S2101	57.48	48.91	11.33	22.18
S2102	57.51	42.19	4.42	18.25
S2103	57.54	43.35	4.11	14.56
S2104	57.57	37.72	3.40	9.28
S2105	57.60	34.60	2.01	5.86
S2106	57.62	31.63	1.39	5.64
S2107	57.65	34.73	0.90	5.09
S2108	57.68	42.54	0.46	4.62
S2109	57.71	43.78	0.47	4.31
S2110	57.73	45.92	0.28	7.44
S2111	57.76	142.07	1.11	14.64
S2112	57.79	62.14	7.27	30.43
S2113	57.82	56.10	16.84	30.38
S2114	57.84	37.73	13.51	22.42
S2115	57.87	33.77	7.53	13.35
S2116	57.90	28.15	2.66	6.95
S2117	57.93	27.19	2.11	5.56
S2118	57.95	30.78	1.48	5.56
S2119	57.98	36.59	1.04	4.93
S2120	58.01	46.95	0.20	3.57
S2121	58.04	53.35	0.51	8.67
S2122	58.06	60.76	2.03	15.35
S2123	58.09	52.80	2.40	16.06
S2124	58.12	42.73	3.86	16.39
S2125	58.15	40.32	1.89	10.43
S2126	58.17	43.77	3.08	11.05
S2127	58.20	39.57	23.19	12.97
S2128	58.23	52.47	2.53	6.66
S2129	58.25	50.06	2.03	4.59
S2130	58.28	39.67	0.79	4.95
S2131	58.31	42.66	0.64	4.10
S2132	58.34	60.06	0.13	2.71
S2133	58.36	74.79	1.01	8.59
S2134	58.39	54.13	2.17	15.65
S2135	58.42	47.63	2.15	13.57
S2136	58.45	29.79	15.35	10.29
S2137	58.47	25.85	12.40	6.44
S2138	58.50	28.82	1.62	5.46
S2139	58.53	26.73	1.23	3.74
S2140	58.56	31.05	1.36	3.64
S2141	58.58	44.95	0.71	3.62
S2142	58.61	71.45	0.41	3.70
S2143	58.64	91.16	0.36	3.55
S2144	58.67	61.56	6.29	19.99
S2145	58.69	52.67	11.02	15.52
S2146	58.72	45.10	14.05	20.82
S2147	58.75	42.76	13.92	20.34
S2148	58.78	34.25	3.30	13.25
S2149	58.80	33.96	0.44	6.27
S2150	58.83	59.05	0.17	6.02
S2151	58.86	81.90	0.15	3.87
S2152	58.89	79.32	0.45	9.83
S2153	58.91	77.61	3.25	23.08
S2154	58.94	67.37	2.37	26.48
S2155	58.97	62.06	5.25	26.75
S2156	59.00	43.57	2.08	16.72
S2157	59.02	35.42	4.39	14.40
S2158	59.05	28.41	6.94	10.93
S2159	59.08	28.32	4.51	7.68
S2160	59.11	25.81	0.45	4.13
S2161	59.13	21.41	2.46	5.68
S2162	59.16	95.37	1.60	7.67
S2163	59.19	59.32	0.37	7.23
S2164	59.22	77.49	0.49	6.42
S2165	59.24	74.61	10.76	24.88
S2166	59.27	38.84	8.19	21.75
S2167	59.30	32.36	4.69	11.96
S2168	59.32	29.45	4.86	7.21
S2169	59.35	38.41	4.22	4.42
S2170	59.38	47.81	0.65	3.88
S2171	59.41	45.92	1.50	4.73
S2172	59.43	71.47	0.65	6.80
S2173	59.46	65.27	0.93	11.24
S2174	59.49	62.02	4.74	16.74
S2175	59.52	58.04	5.40	22.81
S2176	59.54	66.87	4.87	12.28
S2177	59.57	138.19	2.98	7.64
S2178	59.60	103.44	3.74	13.09
S2179	59.63	98.71	6.54	20.04
S2180	59.66	60.71	8.67	15.66
S2181	59.69	40.81	9.38	7.32
S2182	59.72	35.56	13.70	7.49
S2183	59.75	40.72	11.44	6.88
S2184	59.78	38.05	2.03	6.02
S2185	59.80	47.86	0.91	7.28
S2186	59.83	78.12	3.62	20.63
S2187	59.86	73.48	4.68	23.47
S2188	59.89	65.32	2.10	22.09
S2189	59.92	55.98	2.42	16.03
S2190	59.95	44.13	7.43	15.46
S2191	59.98	34.79	16.65	10.90
S2192	60.01	45.24	4.27	9.31
S2193	60.04	46.22	1.06	6.84
S2194	60.07	53.43	0.67	13.46
S2195	60.10	87.34	2.54	25.67
S2196	60.12	66.67	2.86	29.05
S2197	60.15	60.91	5.39	25.99
S2198	60.18	53.67	16.98	30.95
S2199	60.21	44.12	13.03	22.24
S2200	60.24	46.70	1.18	9.95
S2201	60.27	44.65	0.32	5.70
S2202	60.30	47.22	0.86	6.16
S2203	60.33	51.77	2.47	5.19
S2204	60.36	56.44	9.41	11.58
S2205	60.39	61.48	19.19	32.36
S2206	60.42	54.58	12.06	31.43
S2207	60.44	45.31	9.23	22.44
S2208	60.47	35.09	10.85	12.72
S2209	60.50	29.84	13.37	11.16
S2210	60.53	27.36	8.31	11.91
S2211	60.56	44.67	6.99	8.89
S2212	60.59	77.86	0.70	6.50
S2213	60.62	69.11	0.38	5.40
S2214	60.65	77.16	0.23	5.19
S2215	60.67	77.04	0.24	4.89
S2216	60.70	74.26	0.94	9.25
S2217	60.73	64.28	3.74	12.18
S2218	60.76	49.12	5.28	13.32
S2219	60.78	36.67	4.57	10.10
S2220	60.81	29.64	4.19	8.28
S2221	60.84	29.97	2.04	6.56
S2222	60.87	36.08	1.51	6.95
S2223	60.89	49.72	2.74	6.18
S2224	60.92	111.61	0.25	4.44
S2225	60.95	82.45	0.28	4.11
S2226	60.98	70.81	0.90	11.91
S2227	61.00	49.49	1.07	13.54
S2228	61.03	36.27	2.19	14.05
S2229	61.06	30.59	7.36	15.88
S2230	61.09	27.58	9.09	19.96
S2231	61.11	28.98	11.06	11.23
S2232	61.14	39.09	6.14	6.37
S2233	61.17	47.01	1.50	4.90
S2234	61.20	55.21	0.58	4.59
S2235	61.22	66.00	0.54	4.73
S2236	61.25	114.11	0.23	4.48
S2237	61.28	91.94	0.59	3.98
S2238	61.30	75.68	0.82	11.98
S2239	61.33	74.36	2.34	18.77
S2240	61.36	68.61	4.61	28.58
S2241	61.39	59.12	4.23	16.75
S2242	61.41	51.12	9.15	30.58
S2243	61.44	34.56	5.32	14.21
S2244	61.47	31.47	13.28	7.71
S2245	61.50	41.65	0.63	4.01
S2246	61.52	44.05	1.42	4.78
S2247	61.55	52.29	0.23	3.70
S2248	61.58	110.55	3.41	9.66
S2249	61.61			
S2250	61.63	37.93	2.61	10.23
S2251	61.66	34.51	2.37	10.01
S2252	61.68	33.91	2.32	6.40
S2253	61.71	34.78	7.30	5.11
S2254	61.73	41.26	5.50	3.82
S2255	61.75	45.42	3.65	3.92
S2256	61.78	58.05	1.13	5.48
S2257	61.80	60.25	0.33	4.30
S2258	61.82	56.27	1.37	6.32
S2259	61.85	74.49	3.16	25.02
S2260	61.87	83.29	5.57	27.18
S2261	61.89	45.28	19.92	20.01
S2262	61.92	37.57	17.58	12.74
S2263	61.94	34.46	11.09	7.62
S2264	61.97	40.63	6.23	4.87
S2265	61.99	46.45	2.17	3.49
S2266	62.01	48.67	1.40	3.83
S2267	62.04	47.97	0.44	4.01
S2268	62.06	56.79	0.27	3.77
S2269	62.08	65.32	0.99	5.84
S2270	62.11	70.45	1.02	7.07
S2271	62.13	70.15	4.53	19.74
S2272	62.16	69.57	4.79	20.56
S2273	62.18	67.82	7.53	23.12
S2274	62.20	55.04	7.12	20.72
S2275	62.23	41.82	1.91	11.40
S2276	62.25	33.23	4.11	8.05
S2277	62.27	31.13	1.32	4.47
S2278	62.30	39.47	0.97	4.58
S2279	62.32	58.53	0.32	4.59
S2280	62.35	62.02	0.38	4.45
S2281	62.37	64.77	0.28	3.71
S2282	62.39	68.50	0.64	5.56
S2283	62.42	67.79	2.76	21.54
S2284	62.44	59.58	2.39	16.36
S2285	62.46	55.60	3.73	15.11
S2286	62.49	42.82	7.71	16.60
S2287	62.51	37.81	6.50	14.50
S2288	62.53	33.04	8.36	10.47
S2289	62.56	36.99	1.91	6.92
S2290	62.58	40.76	1.86	6.94
S2291	62.61	49.77	0.39	5.33
S2292	62.63	67.21	0.36	4.29
S2293	62.65	77.91	0.33	3.45
S2294	62.68	75.47	0.63	6.71
S2295	62.70	80.68	2.14	19.88
S2296	62.73	75.65	3.52	22.64
S2297	62.76	58.40	8.06	23.97
S2298	62.78	41.06	8.36	19.16
S2299	62.81	40.51	7.99	13.89
S2300	62.84	41.24	8.83	11.38
S2301	62.86	34.01	11.64	10.36
S2302	62.89	35.45	11.25	8.87
S2303	62.92	40.53	1.45	7.64
S2304	62.94	45.48	0.87	5.55
S2305	62.97	55.02	1.36	3.84
S2306	63.00	62.67	0.69	3.94
S2307	63.02	70.87	1.07	6.59
S2308	63.05	81.29	1.42	9.83
S2309	63.07	88.23	7.22	21.86
S2310	63.10	80.13	8.23	25.06
S2311	63.13	68.32	3.48	10.36
S2312	63.15	49.31	4.61	6.68
S2313	63.18	43.64	2.19	4.71
S2314	63.21	43.71	2.26	4.78
S2315	63.23	49.71	1.32	8.94
S2316	63.26	55.41	0.86	7.53
S2317	63.29	54.24	0.77	6.68
S2318	63.31	58.26	0.81	7.26
S2319	63.34	75.63	0.68	7.46
S2320	63.37	82.08	1.73	9.23
S2321	63.39	61.96	4.14	9.95
S2322	63.42	51.62	5.95	8.44
S2323	63.44	42.47	8.08	13.96
S2324	63.47	28.93	12.93	8.58
S2325	63.50	32.16	5.69	5.92
S2326	63.52	45.42	1.53	4.97
S2327	63.55	60.71	1.09	4.94
S2328	63.58	80.98	0.79	4.86
S2329	63.60	80.41	2.82	13.89
S2330	63.63	74.28	3.64	21.53
S2331	63.66	47.67	7.52	11.78
S2332	63.69	25.21	7.81	7.87
S2333	63.72	22.69	4.47	4.89
S2334	63.74	26.97	12.64	6.52
S2335	63.77	35.76	4.00	6.33
S2336	63.80	59.72	1.37	6.91
S2337	63.83	72.77	0.41	5.37
S2338	63.86	70.81	1.54	8.22
S2339	63.89	72.13	2.47	22.91
S2340	63.92	65.73	2.86	23.71
S2341	63.95	46.61	2.34	14.00
S2342	63.97	34.01	5.92	12.80
S2343	64.00	28.01	7.47	13.30
S2344	64.03	38.23	2.34	8.82
S2345	64.06	58.92	0.63	7.68
S2346	64.09	70.31	1.27	7.82
S2347	64.12	74.88	0.22	5.56
S2348	64.15	77.31	0.55	5.53
S2349	64.18	76.75	1.35	9.87
S2350	64.20	64.14	1.10	10.98
S2351	64.23	59.18	5.07	23.29
S2352	64.26	45.90	9.75	19.94
S2353	64.29	27.60	8.49	12.01
S2354	64.32	25.91	2.76	9.27
S2355	64.35	27.18	2.00	6.74
S2356	64.38	32.36	4.31	4.61
S2357	64.41	51.32	2.13	3.92
S2358	64.44	71.73	3.33	4.45
S2359	64.46	89.06	0.80	3.50
S2360	64.49	103.00	0.71	6.27
S2361	64.52	112.24	1.04	10.62
S2362	64.55	104.24	1.42	12.92
S2363	64.58	92.96	3.49	15.29
S2364	64.61	76.05	8.29	15.66
S2365	64.64	46.43	5.79	11.39
S2366	64.67	38.68	5.06	9.93
S2367	64.70	45.42	0.90	8.37
S2368	64.72	54.68	0.26	5.83
S2369	64.75	62.49	0.29	3.95
S2370	64.78	87.43	0.52	6.40
S2371	64.80	100.11	0.28	6.31
S2372	64.83	70.19	0.68	8.62
S2373	64.86	67.69	1.19	12.93
S2374	64.88	60.41	3.42	14.49
S2375	64.91	52.35	7.53	16.78
S2376	64.94	46.77	3.88	10.89
S2377	64.96	49.63	3.58	8.78
S2378	64.99	58.43	1.52	7.37
S2379	65.01	65.89	1.10	6.25
S2380	65.04	81.60	1.19	4.58
S2381	65.07	89.63	0.82	3.97
S2382	65.09	36.00	20.47	2.81
S2383	65.12	46.62	20.47	5.03
S2384	65.15	48.49	8.19	8.81
S2385	65.17	49.61	8.91	12.33
S2386	65.20	58.62	2.34	10.83
S2387	65.23	63.74	0.81	9.75
S2388	65.25	56.82	0.19	7.66
S2389	65.28	57.51	0.16	4.95
S2390	65.30	58.76	0.39	4.60
S2391	65.33	57.12	2.71	9.11
S2392	65.36	56.03	5.57	20.20
S2393	65.38	52.60	5.72	15.83
S2394	65.41	47.59	5.40	14.24
S2395	65.44	47.99	5.94	11.70
S2396	65.46	53.52	6.96	12.49
S2397	65.49	65.55	2.80	7.75
S2398	65.52	73.89	1.97	5.65
S2399	65.54	76.51	1.01	5.58
S2400	65.57	61.62	1.00	8.61
S2401	65.60	81.61	1.04	10.22
S2402	65.62	81.96	9.59	13.03
S2403	65.65	75.42	11.75	16.20
S2404	65.67	46.30	16.44	19.35
S2405	65.70	67.58	2.64	11.32
S2406	65.73	56.72	0.70	10.76
S2407	65.75	60.55	0.50	9.96
S2408	65.78	59.49	0.24	7.52
S2409	65.81	65.78	0.73	7.74
S2410	65.84	60.68	2.29	18.25
S2411	65.87	45.26	9.51	17.32
S2412	65.90	38.67	9.03	14.54
S2413	65.93	42.64	8.60	11.05
S2414	65.95	57.47	2.51	7.24
S2415	65.98	68.53	5.58	8.65
S2416	66.01	87.33	0.65	6.91
S2417	66.04	153.83	0.30	5.25
S2418	66.07	137.78	0.22	4.08
S2419	66.09	61.43	0.37	4.62
S2420	66.12	65.56	2.89	16.07
S2421	66.15	58.43	8.81	17.96
S2422	66.18	52.35	5.97	11.33
S2423	66.21	50.51	4.31	8.34
S2424	66.24	48.40	5.84	6.85
S2425	66.26	45.95	5.74	5.12
S2426	66.29	53.69	1.93	4.87
S2427	66.32	42.58	0.78	5.50
S2428	66.35	87.36	0.21	5.01
S2429	66.38	70.48	0.22	3.96
S2430	66.41	76.01	0.28	4.08
S2431	66.43	94.85	0.74	9.77
S2432	66.46	71.51	2.18	17.79
S2433	66.49	55.42	5.85	21.66
S2434	66.52	41.88	16.71	19.61
S2435	66.55	52.21	18.57	19.43
S2436	66.58	54.52	5.09	15.51
S2437	66.60	112.61	5.07	11.91
S2438	66.63	69.14	2.24	9.04
S2439	66.66	75.94	1.00	7.97
S2440	66.69	65.59	0.55	7.04
S2441	66.72	69.69	0.32	5.20
S2442	66.75	83.55	1.13	6.74
S2443	66.78	78.41	20.74	15.74
S2444	66.82		13.33	9.19
S2445	66.86	39.61	5.59	8.50
S2446	66.90	75.04	3.18	8.01
S2447	66.94	118.70	1.74	4.20
S2448	66.99	136.18	2.84	12.79
S2449	67.03	133.20	10.29	23.55
S2450	67.07	97.29	11.80	13.75
S2451	67.11	69.02	3.58	11.37
S2452	67.15	63.18	1.36	5.12
S2453	67.19	81.47	1.34	6.32
S2454	67.23	101.76	10.71	19.56
S2455	67.26	99.75	20.62	8.04
S2456	67.29	62.80	20.61	7.44
S2457	67.33	56.42	2.67	6.12
S2458	67.36	84.79	1.68	3.72
S2459	67.39	78.30	2.53	5.33
S2460	67.42	64.80	4.87	14.14
S2461	67.46	64.73	3.33	6.55
S2462	67.49	64.12	8.77	7.24
S2463	67.52	50.62	18.66	15.89
S2464	67.55	43.46	29.52	16.16
S2465	67.59	40.89	5.37	9.81
S2466	67.62	56.32	2.50	9.60
S2467	67.65	66.24	2.38	4.57
S2468	67.69	79.13	3.00	8.40
S2469	67.72	91.11	2.98	9.08
S2470	67.76	115.13	6.01	29.15
S2471	67.79	44.24	54.60	18.70
S2472	67.82	45.31	15.53	9.25
S2473	67.85	42.75	3.43	8.68
S2474	67.88	39.36	4.03	6.39
S2475	67.92	51.27	1.73	3.85
S2476	67.95	64.42	2.85	4.11
S2477	67.98	85.15	2.57	9.92
S2478	68.01	72.22	3.75	17.54
S2479	68.04	62.76	13.58	28.36
S2480	68.07	51.40	16.40	25.97
S2481	68.10	46.71	13.52	14.37
S2482	68.13	55.78	5.43	7.62
S2483	68.16	66.20	3.05	6.16
S2484	68.19	66.96	3.06	6.10
S2485	68.23	61.23	2.32	6.87
S2486	68.26	62.42	4.44	32.23
S2487	68.29	72.23	23.85	45.86
S2488	68.32	101.08	40.39	85.70
S2489	68.35	39.93	8.92	14.11
S2490	68.38	42.62	30.09	6.92
S2491	68.41	58.31	3.49	8.44
S2492	68.44	71.46	2.05	8.07
S2493	68.47	64.80	2.53	6.06
S2494	68.50	63.51	1.95	8.65
S2495	68.54	61.16	2.32	8.22
S2496	68.57	57.39	4.01	19.38
S2497	68.60	51.30	15.33	19.71
S2498	68.63	44.11	8.76	6.68
S2499	68.66	45.25	10.59	6.76
S2500	68.69	53.03	6.04	9.89
S2501	68.72	62.92	2.37	8.38
S2502	68.76	68.58	2.93	8.87
S2503	68.81	96.92	7.07	22.16
S2504	68.85	69.93	11.99	33.68
S2505	68.89	61.68	11.75	6.09
S2506	68.93	71.85	16.65	4.72
S2507	68.97	88.87	7.40	7.91
S2508	69.01	76.16	9.84	9.43
S2509	69.05	83.92	17.89	61.34
S2510	69.09	105.21	39.55	100.86
S2511	69.13	53.21	30.08	50.52
S2512	69.17	36.12	11.76	9.43
S2513	69.21	45.09	11.81	10.19
S2514	69.25	56.18	10.60	8.00
S2515	69.30	62.95	26.45	17.64
S2516	69.34	75.18	14.41	18.98
S2517	69.38	99.84	18.52	27.28
S2518	69.42	49.24	18.40	15.82
S2519	69.46	41.20	14.09	7.56
S2520	69.50	49.49	20.26	11.22
S2521	69.54	45.51	4.48	5.08
S2522	69.58	48.60	4.97	5.60
S2523	69.62	69.30	9.36	10.99
S2524	69.66	53.40	7.61	13.67
S2525	69.70	33.20	7.20	10.66
S2526	69.74	37.85	10.26	7.50
S2527	69.79	54.23	11.32	10.28
S2528	69.82	54.11	1.44	6.42
S2529	69.84	40.24	0.61	5.72
S2530	69.87	81.09	0.36	6.69
S2531	69.89	80.39	0.28	5.81
S2532	69.92	57.56	0.30	6.40
S2533	69.94	60.63	0.99	5.98
S2534	69.97	59.80	2.58	10.54
S2535	69.99	59.47	3.67	12.85
S2536	70.02	52.71	4.09	17.23
S2537	70.04	45.60	3.49	9.99
S2538	70.07	26.71	10.65	7.82
S2539	70.09	24.18	28.48	6.48
S2540	70.12	27.90	2.92	3.95
S2541	70.14	38.61	1.18	3.01
S2542	70.17	48.04	0.31	2.59
S2543	70.19	56.30	0.40	3.75
S2544	70.22	67.39	0.78	6.48
S2545	70.24	94.08	2.23	10.85
S2546	70.27	60.29	6.10	14.71
S2547	70.29	59.19	11.73	10.91
S2548	70.32	48.25	9.71	8.99
S2549	70.34	46.56	1.53	4.87
S2550	70.36	42.98	2.24	4.78
S2551	70.39	50.00	2.30	3.26
S2552	70.41	64.04	0.73	2.97
S2553	70.44	96.54	0.59	2.28
S2554	70.46	117.07	0.29	2.69
S2555	70.49	131.78	0.83	6.85
S2556	70.51	123.44	3.63	28.17
S2557	70.54	108.67	10.62	18.90
S2558	70.56	80.59	12.71	15.85
S2559	70.59	65.24	5.22	7.29
S2560	70.61	48.54	3.08	5.36
S2561	70.64	39.68	1.39	2.84
S2562	70.66	42.18	2.03	4.70
S2563	70.69	51.15	0.52	3.58
S2564	70.71	62.91	0.50	3.33
S2565	70.74	103.54	3.38	19.55
S2566	70.76	75.71	4.39	23.53
S2567	70.79	63.09	5.93	20.79
S2568	70.82	47.88	1.77	11.95
S2569	70.84	34.64	2.11	6.17
S2570	70.87	34.29	3.71	5.28
S2571	70.90	37.83	1.24	3.48
S2572	70.93	39.91	0.66	2.92
S2573	70.95	32.53	0.45	2.10
S2574	70.98	35.70	0.22	1.86
S2575	71.01	49.59	1.04	2.03
S2576	71.04	63.86	0.24	1.64
S2577	71.06	68.05	5.01	12.17
S2578	71.09	80.66	2.56	13.61
S2579	71.12	74.46	11.03	22.70
S2580	71.15	62.44	2.51	13.72
S2581	71.17	49.50	8.73	10.55
S2582	71.20	49.90	2.25	8.09
S2583	71.23	57.54	1.99	5.41
S2584	71.26	68.71	0.71	5.79
S2585	71.28	66.97	0.32	4.41
S2586	71.31	70.10	0.67	8.05
S2587	71.34	58.87	12.36	12.23
S2588	71.37	57.81	14.90	22.14
S2589	71.39	49.25	6.54	17.16
S2590	71.42	35.95	1.83	11.60
S2591	71.45	28.11	1.63	6.77
S2592	71.47	22.80	1.15	8.31
S2593	71.50	30.77	0.38	4.72
S2594	71.53	45.01	0.15	3.85
S2595	71.56	54.14	0.20	3.27
S2596	71.58	62.24	0.38	8.30
S2597	71.61	77.15	2.95	18.26
S2598	71.64	69.24	4.14	25.99
S2599	71.67	67.81	13.50	26.96
S2600	71.69	51.99	7.30	24.57
S2601	71.72	33.11	4.67	15.17
S2602	71.75	50.48	5.56	9.88
S2603	71.78	53.84	0.44	6.27
S2604	71.81	58.30	0.24	4.97
S2605	71.83	71.39	0.29	4.71
S2606	71.86	82.93	1.37	9.48
S2607	71.89	73.05	2.18	12.58
S2608	71.92	42.03	10.63	15.79
S2609	71.94	33.09	6.64	13.26
S2610	71.97	31.50	3.72	11.97
S2611	72.00	36.98	7.79	6.45
S2612	72.03	55.99	3.97	5.51
S2613	72.06	53.15	2.29	3.87
S2614	72.08	45.43	0.71	4.31
S2615	72.11	65.95	0.42	3.79
S2616	72.14	62.47	0.49	6.52
S2617	72.17	68.79	0.67	12.06
S2618	72.19	63.65	5.07	27.33
S2619	72.22	63.41	18.88	22.66
S2620	72.25	55.49	4.33	14.51
S2621	72.28	47.05	1.71	6.48
S2622	72.30	42.27	6.24	6.11
S2623	72.33	52.73	1.97	5.49
S2624	72.36	57.27	0.34	3.87
S2625	72.39	64.38	1.75	8.74
S2626	72.42	54.63	3.04	12.75
S2627	72.44	44.19	7.10	13.63
S2628	72.47	27.59	7.63	10.83
S2629	72.50	27.11	7.32	7.07
S2630	72.53	30.69	13.33	6.41
S2631	72.55	43.90	3.73	4.23
S2632	72.58	52.33	0.81	5.48
S2633	72.61	72.74	0.41	4.88
S2634	72.64	68.90	0.26	4.60
S2635	72.66	68.38	4.59	15.17
S2636	72.69	61.75	7.64	21.81
S2637	72.72	52.89	7.42	14.35
S2638	72.75	46.00	9.80	10.43
S2639	72.78	45.63	3.76	7.74
S2640	72.80	39.92	3.98	5.38
S2641	72.83	38.89	4.80	3.55
S2642	72.86	31.00	20.91	3.78
S2643	72.88	46.30	2.74	4.88
S2644	72.91	63.46	0.24	3.84
S2645	72.94	70.18	0.45	3.47
S2646	72.96	52.42	4.37	15.12
S2647	72.99	58.01	4.99	19.99
S2648	73.01	54.28	3.85	14.15
S2649	73.04	42.71	11.76	16.92
S2650	73.07	37.53	19.50	21.23
S2651	73.09	41.20	17.15	13.44
S2652	73.12	61.51	1.03	9.09
S2653	73.15	77.64	0.69	5.69
S2654	73.17	75.24	0.37	5.14
S2655	73.20	79.41	0.38	5.25
S2656	73.22	77.02	2.68	18.22
S2657	73.25	57.98	11.53	21.58
S2658	73.28	44.98	8.97	15.08
S2659	73.30	37.27	4.58	10.95
S2660	73.33	35.64	3.33	10.79
S2661	73.36	40.78	2.93	6.11
S2662	73.38	43.73	3.21	5.61
S2663	73.41	43.41	2.55	4.80
S2664	73.44	45.30	0.76	3.87
S2665	73.46	191.76	0.85	3.88
S2666	73.49	191.14	0.29	3.72
S2667	73.51	116.86	0.43	4.20
S2668	73.54	106.02	1.86	17.52
S2669	73.57	122.87	1.81	21.31
S2670	73.59	70.58	6.11	17.62
S2671	73.62	58.68	17.87	15.38
S2672	73.65	52.27	3.58	13.96
S2673	73.67	39.39	7.64	9.65
S2674	73.70	40.22	4.63	7.79
S2675	73.72	50.49	2.88	4.51
S2676	73.75	98.14	0.68	4.91
S2677	73.78	85.54	0.68	11.60
S2678	73.80	89.15	3.28	21.11
S2679	73.83	74.84	9.54	27.74
S2680	73.85	59.60	13.08	23.36
S2681	73.88	43.53	12.62	16.88
S2682	73.90	32.92	5.11	11.49
S2683	73.93	45.52	1.31	7.42
S2684	73.95	83.38	0.96	9.54
S2685	73.98	39.37	0.67	6.93
S2686	74.00	78.16	0.57	8.87
S2687	74.03	65.85	0.97	13.80
S2688	74.05	70.32	25.07	32.27
S2689	74.08	56.98	4.85	21.03
S2690	74.10	43.20	10.12	16.88
S2691	74.12	43.44	4.95	10.35
S2692	74.15	40.29	1.62	10.07
S2693	74.17	42.40	1.86	7.87
S2694	74.20	56.24	0.37	5.82
S2695	74.22	68.71	0.25	4.19
S2696	74.25	74.69	0.61	4.94
S2697	74.27	80.18	7.24	12.63
S2698	74.30	77.07	7.27	18.46
S2699	74.32	63.29	15.26	15.06
S2700	74.35	51.08	12.72	14.05
S2701	74.37	51.02	6.98	8.64
S2702	74.40	52.98	1.98	6.69
S2703	74.42	59.28	0.76	4.67
S2704	74.45	67.80	2.59	14.56
S2705	74.47	71.33	5.03	22.84
S2706	74.50	63.45	7.14	25.32
S2707	74.52	49.45	13.78	19.75
S2708	74.54	39.77	26.87	15.78
S2709	74.57	59.88	7.27	11.31
S2710	74.59	73.42	1.56	10.83
S2711	74.62	35.76	1.22	10.86
S2712	74.64		1.11	10.37
S2713	74.67			
S2714	74.69	53.72		
S2715	74.72	67.74	0.66	7.80
S2716	74.74	86.25		0.06
S2717	74.77	40.61	0.08	
S2718	74.80	57.70	17.49	37.73
S2719	74.82	45.79	8.89	25.96
S2720	74.85	47.34	7.07	13.21
S2721	74.88	54.78	0.13	
S2722	74.91	11.24	7.74	2.51
S2723	74.94	64.38	20.66	8.42
S2724	74.96	77.93	1.02	6.05
S2725	74.99	87.94	1.25	3.16
S2726	75.02	95.29	1.34	5.84
S2727	75.05	73.20	7.18	15.69
S2728	75.07	53.99	7.13	9.63
S2729	75.10	47.46	5.44	6.56
S2730	75.13	48.41	2.09	4.95
S2731	75.16	50.72	0.83	4.44
S2732	75.19	52.87	0.81	4.33
S2733	75.21	59.46	0.88	3.92
S2734	75.24	68.84	0.50	3.43
S2735	75.27	73.21	1.44	14.48
S2736	75.30	70.72	4.36	23.94
S2737	75.33	63.71	10.23	19.93
S2738	75.35	48.88	29.84	14.16
S2739	75.38	60.66	23.31	8.81
S2740	75.41	67.07	2.87	5.76
S2741	75.44	73.65	2.29	4.09
S2742	75.47	80.50	1.30	5.36
S2743	75.49	79.34	1.19	5.49
S2744	75.52	79.75	3.16	5.25
S2745	75.55	96.18	0.81	4.00
S2746	75.58	86.15	0.67	6.06
S2747	75.60	79.48	0.72	5.93
S2748	75.63	67.39	0.71	9.83
S2749	75.66	49.35	1.33	9.39
S2750	75.69	36.27	12.81	20.64
S2751	75.72	31.27	7.98	13.92
S2752	75.74	30.26	6.98	14.11
S2753	75.77	39.68	3.53	11.19
S2754	75.80	46.74	9.12	9.19
S2755	75.83	67.90	2.14	5.19
S2756	75.86	69.50	3.33	5.60
S2757	75.89	66.50	4.25	11.76
S2758	75.92	63.70	5.17	15.80
S2759	75.96	55.40	3.78	8.25
S2760	75.99	55.20	7.82	10.70
S2761	76.02	52.10	3.63	9.83
S2762	76.05	48.30	4.46	6.32
S2763	76.08	42.90	7.55	4.12
S2764	76.11	34.10	5.54	4.12
S2765	76.14	37.60	4.81	8.14
S2766	76.17	43.20	5.92	5.09
S2767	76.20	56.70	1.58	4.66
S2768	76.24	82.90	2.37	4.09
S2769	76.27	92.20	3.39	12.59
S2770	76.30	104.80	8.66	28.07
S2771	76.33	104.60	9.32	32.70
S2772	76.36	95.20	4.86	16.15
S2773	76.39	83.10	3.65	5.83
S2774	76.42	69.40	13.86	12.35
S2775	76.45	101.80	7.28	7.39
S2776	76.48	105.30	2.54	3.64
S2777	76.51	46.90	2.63	6.18
S2778	76.54	44.50	3.50	9.85
S2779	76.57	66.90	2.88	16.93
S2780	76.60	67.90	9.89	17.92
S2781	76.63	56.40	7.62	3.50
S2782	76.66	51.30	4.54	2.93
S2783	76.69	50.80	4.40	6.22
S2784	76.72	56.10	4.49	6.21
S2785	76.75	63.40	3.19	5.12
S2786	76.78	67.00	2.46	4.41
S2787	76.81	66.50	3.18	9.45
S2788	76.84	64.60	5.52	16.30
S2789	76.87	44.30	32.51	15.96
S2790	76.90	35.31	6.43	3.89
S2791	76.93	37.72	3.15	6.59
S2792	76.95	31.43	1.06	5.54
S2793	76.98	38.63	0.61	4.38
S2794	77.01	52.65	0.25	3.40
S2795	77.03	60.28	0.12	2.81
S2796	77.06	64.64	0.08	2.23
S2797	77.09	64.04	1.73	4.58
S2798	77.11	47.17	11.74	13.33
S2799	77.14	44.77	4.62	7.07
S2800	77.17	42.52	4.57	7.64
S2801	77.19	44.95	4.82	4.78
S2802	77.22	55.68	3.41	4.67
S2803	77.25	59.57	1.54	4.47
S2804	77.27	63.13	0.28	3.75
S2805	77.30	68.42	0.38	2.96
S2806	77.32	49.14	13.71	12.68
S2807	77.35	43.83	8.15	13.25
S2808	77.38	31.19	2.11	11.90
S2809	77.40	22.66	1.29	6.78
S2810	77.43	21.02	0.87	5.45
S2811	77.46	23.29	1.15	4.94
S2812	77.48	29.03	1.24	5.75
S2813	77.51	47.02	1.03	5.55
S2814	77.54	62.45	0.38	4.67
S2815	77.56	63.70	3.04	13.06
S2816	77.59	56.67	2.98	16.49
S2817	77.62	50.88	2.04	9.07
S2818	77.64	42.38	7.66	10.23
S2819	77.67	39.01	2.34	5.80
S2820	77.70	37.43	2.79	7.06
S2821	77.72	53.46	1.99	5.85
S2822	77.75	54.61	0.37	4.90
S2823	77.78	60.16	0.64	5.83
S2824	77.80	64.19	1.51	13.82
S2825	77.83	59.01	8.29	18.39
S2826	77.86	63.47	3.90	12.61
S2827	77.89	77.28	4.14	9.37
S2828	77.92	99.81	0.72	8.32
S2829	77.95	110.09	0.56	5.67
S2830	77.98	117.30	0.77	9.88
S2831	78.01	115.34	0.78	12.73
S2832	78.04	124.18	3.63	24.29
S2833	78.07	118.59	11.73	28.49
S2834	78.10	91.75	3.06	17.41
S2835	78.13	70.50	4.47	12.50
S2836	78.16	56.09	3.95	10.78
S2837	78.19	51.18	6.56	8.22
S2838	78.22	61.55	1.63	9.00
S2839	78.25	82.66	0.57	5.96
S2840	78.28	79.35	0.32	5.72
S2841	78.31	80.31	0.68	4.17
S2842	78.34	73.59	1.14	6.93
S2843	78.37	62.74	1.83	8.70
S2844	78.40	49.19	3.11	12.13
S2845	78.43	29.57	3.95	8.95
S2846	78.46	28.59	3.04	6.40
S2847	78.49	38.90	2.14	5.04
S2848	78.52	52.73	0.74	5.35
S2849	78.55	53.93	1.48	5.08
S2850	78.58	59.18	0.24	4.71
S2851	78.61	60.02	0.37	5.59
S2852	78.64	61.88	1.60	13.80
S2853	78.67	40.75	9.84	14.52
S2854	78.70	35.15	10.71	10.02
S2855	78.73	34.00	10.37	6.69
S2856	78.76	38.45	3.70	6.18
S2857	78.79	33.80	1.44	4.37
S2858	78.83	30.09	0.69	4.17
S2859	78.85	44.75	1.28	2.44
S2860	78.88	58.31	0.48	3.15
S2861	78.91	72.88	0.34	5.67
S2862	78.94	78.12	2.10	15.78
S2863	78.97	73.76	2.31	18.95
S2864	79.00	65.31	2.85	18.24
S2865	79.03	48.11	4.34	21.16
S2866	79.05	44.75	12.54	20.44
S2867	79.08	25.46	3.50	17.18
S2868	79.11	30.37	1.17	14.66
S2869	79.14	129.37	0.08	11.99
S2870	79.17	63.96	0.36	9.75
S2871	79.19	71.48	0.78	8.28
S2872	79.22	77.69	1.90	12.91
S2873	79.25	80.12	3.83	19.30
S2874	79.28	63.86	8.01	14.81
S2875	79.31	57.77	11.13	15.12
S2876	79.34	58.41	2.81	12.90
S2877	79.36	71.22	0.70	9.76
S2878	79.39	78.53	0.44	6.63
S2879	79.42	82.42	0.33	5.08
S2880	79.45	105.99	2.53	13.01
S2881	79.48	67.75	5.00	19.83
S2882	79.51	46.50	3.02	11.79
S2883	79.53	36.01	3.88	8.32
S2884	79.56	38.89	4.76	7.58
S2885	79.59	45.44	2.86	6.79
S2886	79.62	122.03	1.62	6.92
S2887	79.65	137.20	0.18	7.91
S2888	79.68	55.01	0.54	7.14
S2889	79.70	52.99	1.24	10.98
S2890	79.73	41.03	1.61	12.23
S2891	79.76	33.67	2.12	13.40
S2892	79.79	32.07	1.90	12.67
S2893	79.82	36.14	4.94	10.51
S2894	79.85	52.83	2.91	7.95
